# Supplementary material for: The activation of N-glycosidic bond cleavage performed by base-excision repair enzyme hOGG1; theoretical study of the role of Lys 249 residue in activation of G, OxoG and FapyG
Source: Royal Society of Chemistry journal article supplement (doi:10.1039/c4ra08278h), 2014-01-01
Supplement: c4ra08278h1.pdf [file c4ra08278h1.pdf]

**The activation of N-glycosidic bond cleavage operated by base-excision repair enzyme hOGG1; theoretical study of the role of Lys 249 residue in activation of G, OxoG and FapyG**

Jakub Šebera<sup>1</sup>, Lukáš Trantírek<sup>2</sup>, Yoshiyuki Tanaka<sup>3</sup>, Radim Nencka<sup>1</sup>, Jiří Fukal<sup>1</sup>, and Vladimír Sychrovský<sup>1\*</sup>

<sup>1</sup> Institute of Organic Chemistry and Biochemistry AS CR, v.v.i., Flemingovo náměstí 2, CZ, 16610 Praha, Czech Republic

<sup>2</sup> Central European Institute of Technology – Masaryk University, Kamenice 753/5, 625 00 Brno, Czech Republic

<sup>3</sup> Division of Pharmaceutical Chemistry, Tohoku University, Aobayama, Aoba-ku, Sendai, Miyagi 980-8578 Japan

The supplementary information includes Tables S1-S15, Figures S1-S6 and xyz coordinates of optimized structures.

**Table S1.** The interatomic distances (Å) and angles (degrees) of G calculated employing small model and B3LYP-D2/6-31G\*\*/PCM method. The interactions of Lys 249 with G are indicated in parenthesis as follows: C1'-pathway (C1'), N3-pathway (N3), N3-pathway with proton transferred from Nε-ammonium to N3 nitrogen (N3H). The numbering of atoms can be found in Figure 1.

| Geometry Parameter   | G     | G (C1') | G (N3) | G (N3H) |
|----------------------|-------|---------|--------|---------|
| Interatomic distance |       |         |        |         |
| C1'-N9               | 1.468 | 1.460   | 1.461  | 1.471   |
| Nε-N9                | -     | 4.262   | 3.912  | 3.902   |
| Nε-C1'               | -     | 3.291   | 3.481  | 3.448   |
| Nε-N3                | -     | 3.954   | 2.734  | 2.681   |
| N9-C8                | 1.382 | 1.382   | 1.387  | 1.389   |
| C8-O8                | -     | -       | -      | -       |
| N9-C4                | 1.368 | 1.369   | 1.368  | 1.358   |
| C4-N3                | 1.358 | 1.358   | 1.366  | 1.375   |
| C8-N7                | 1.313 | 1.312   | 1.309  | 1.309   |
| N7-C5                | 1.382 | 1.382   | 1.380  | 1.378   |
| C4-C5                | 1.397 | 1.397   | 1.392  | 1.387   |
| N7-H7                | -     | -       | -      | -       |
| C1'-H1'              | 1.095 | 1.093   | 1.097  | 1.097   |
| N9-Hε1               | -     | -       | 3.114  | 2.822   |
| Nε-Hε1               | -     | -       | 1.088  | 1.574   |
| Nε-Hε2               | -     | 1.018   | 1.024  | 1.021   |
| Nε-Hε3               | -     | 1.018   | 1.023  | 1.020   |
| Angle                |       |         |        |         |
| C8-N9-C4             | 106.4 | 106.3   | 106.0  | 105.4   |
| C8-N9-C1'            | 128.5 | 127.3   | 126.1  | 126.3   |
| C4-N9-Nε             | -     | 90.7    | 68.6   | 68.3    |
| C1'-N9-Nε            | -     | 35.8    | 62.3   | 61.4    |
| N9-Hε1-Nε            | -     | -       | 130.7  | 122.6   |
| Dihedral angle       |       |         |        |         |
| χ                    | 193.5 | 217.7   | 229.5  | 223.0   |
| κ'                   | -3.1  | -3.8    | 1.5    | 2.3     |

**Table S2.** The interatomic distances (Å) and angles (degrees) of OxoG calculated employing small model and B3LYP-D2/6-31G\*\*/PCM method. The interactions of Lys 249 with OxoG are indicated in parenthesis as follows: C1'-pathway (C1'), N3-pathway (N3), N3-pathway with proton transferred from Nε-ammonium to N3 nitrogen (N3H), N9-pathway (N9). The numbering of atoms can be found in Figure 1.

| Geometry Parameter   | OxoG  | OxoG (C1') | OxoG (N3) | OxoG (N3H) | OxoG (N9) |
|----------------------|-------|------------|-----------|------------|-----------|
| Interatomic distance |       |            |           |            |           |
| C1'-N9               | 1.456 | 1.454      | 1.458     | 1.464      | 1.479     |
| Nε-N9                | -     | 3.505      | 3.802     | 3.772      | 2.929     |
| Nε-C1'               | -     | 3.208      | 3.516     | 3.435      | 3.358     |
| Nε-N3                | -     | 3.104      | 2.769     | 2.644      | 3.518     |
| N9-C8                | 1.415 | 1.413      | 1.423     | 1.429      | 1.442     |
| C8-O8                | 1.226 | 1.225      | 1.221     | 1.217      | 1.220     |
| N9-C4                | 1.384 | 1.381      | 1.380     | 1.368      | 1.407     |
| C4-N3                | 1.350 | 1.352      | 1.362     | 1.372      | 1.348     |
| C8-N7                | 1.378 | 1.380      | 1.378     | 1.380      | 1.372     |
| N7-C5                | 1.392 | 1.392      | 1.390     | 1.389      | 1.394     |
| C4-C5                | 1.380 | 1.382      | 1.376     | 1.371      | 1.371     |
| N7-H7                | 1.008 | 1.008      | 1.009     | 1.009      | 1.009     |
| C1'-H1'              | 1.095 | 1.091      | 1.097     | 1.096      | 1.092     |
| N9-Hε1               | -     | -          | 3.050     | 2.790      | 1.958     |
| Nε-Hε1               | -     | -          | 1.075     | 1.508      | 1.039     |
| Nε-Hε2               | -     | 1.017      | 1.024     | 1.021      | 1.024     |
| Nε-Hε3               | -     | 1.018      | 1.024     | 1.021      | 1.024     |
| Angle                |       |            |           |            |           |
| C8-N9-C4             | 109.3 | 109.5      | 109.0     | 108.5      | 107.6     |
| C8-N9-C1'            | 126.1 | 125.6      | 124.1     | 123.7      | 123.4     |
| C4-N9-Nε             | -     | 77.1       | 70.2      | 69.5       | 92.7      |
| C1'-N9-Nε            | -     | 66.2       | 67.6      | 65.5       | 93.3      |
| N9-Hε1-Nε            | -     | -          | 127.5     | 119.7      | 154.4     |
| Dihedral angle       |       |            |           |            |           |
| χ                    | 262.0 | 251.1      | 261.6     | 256.3      | 285.3     |
| κ'                   | 10.5  | 2.6        | 17.1      | 18.4       | 37.8      |

**Table S3.** The interatomic distances (Å) and angles (degrees) of FapyG calculated employing small model and B3LYP-D2/6-31G\*\*/PCM method. The interactions of Lys 249 with FapyG are indicated in parenthesis as follows: C1'-pathway (C1'), N3-pathway (N3), N3-pathway with proton transferred from Nε-ammonium to N3 nitrogen (N3H), N9-pathway (N9), N9-pathway with proton transferred from Nε-ammonium to N9 nitrogen (N9H). The numbering of atoms can be found in Figure 1.

| Geometry Parameter   | FapyG | FapyG (C1') | FapyG (N3) | FapyG (N3H) | FapyG (N9) | FapyG (N9H) |
|----------------------|-------|-------------|------------|-------------|------------|-------------|
| Interatomic distance |       |             |            |             |            |             |
| C1'-N9               | 1.446 | 1.446       | 1.463      | 1.464       | 1.480      | 1.514       |
| Nε-N9                | -     | 4.494       | 3.115      | 3.480       | 2.753      | 2.656       |
| Nε-C1'               | -     | 3.402       | 3.297      | 3.388       | 3.301      | 3.205       |
| Nε-N3                | -     | 4.771       | 2.733      | 2.680       | 3.289      | 3.270       |
| N9-C8                | 3.173 | 3.172       | 3.213      | 3.201       | 3.211      | 3.170       |
| C8-O8                | 1.237 | 1.237       | 1.234      | 1.232       | 1.234      | 1.237       |
| N9-C4                | 1.361 | 1.359       | 1.379      | 1.361       | 1.409      | 1.445       |
| C4-N3                | 1.369 | 1.369       | 1.381      | 1.395       | 1.366      | 1.354       |
| C8-N7                | 1.348 | 1.348       | 1.352      | 1.355       | 1.353      | 1.350       |
| N7-C5                | 1.422 | 1.422       | 1.417      | 1.414       | 1.415      | 1.408       |
| C4-C5                | 1.404 | 1.404       | 1.386      | 1.382       | 1.381      | 1.374       |
| N7-H7                | 1.017 | 1.016       | 1.017      | 1.016       | 1.017      | 1.018       |
| N9-H9                | 1.024 | 1.023       | 1.025      | 1.026       | 1.026      | 1.051       |
| C1'-H1'              | 1.091 | 1.089       | 1.093      | 1.091       | 1.090      | 1.091       |
| N9-He1               | -     | -           | 2.587      | 2.521       | 1.699      | 1.130       |
| N3-He1               |       |             | 1.666      | 1.106       | 2.695      | 2.467       |
| Nε-He1               | -     | -           | 1.077      | 1.576       | 1.078      | 1.543       |
| Nε-He2               | -     | 1.019       | 1.022      | 1.020       | 1.022      | 1.019       |
| Nε-He3               | -     | 1.018       | 1.024      | 1.020       | 1.023      | 1.019       |
| Angle                |       |             |            |             |            |             |
| C8-N9-C4             | 81.0  | 81.0        | 78.8       | 78.0        | 78.3       | 78.7        |
| H9-N9-C4             | 114.2 | 114.0       | 112.2      | 112.2       | 111.0      | 108.6       |
| C8-N9-C1'            | 151.0 | 150.8       | 133.1      | 134.8       | 128.0      | 111.6       |
| H9-N9-C1'            | 116.1 | 115.9       | 115.0      | 115.8       | 113.5      | 110.2       |
| C4-N9-Nε             | -     | 111.4       | 86.9       | 82.1        | 112.8      | 110.6       |
| C1'-N9-Nε            | -     | 34.5        | 83.9       | 74.2        | 98.0       | 96.6        |
| N9-He1-Nε            | -     | -           | 109.4      | 114.3       | 164.4      | 166.6       |
| Dihedral angle       |       |             |            |             |            |             |
| χ                    | 288.8 | 288.4       | 305.7      | 297.8       | 300.9      | 306.0       |
| κ <sup>1</sup>       | 37.8  | 39.5        | 76.9       | 75.0        | 84.4       | 93.3        |
| κ <sup>2</sup>       | 30.3  | 31.6        | 41.9       | 38.3        | 49.6       | 58.0        |

<sup>1</sup>κ' for torsional angle C4-N9-C1'-C8 - 180°

<sup>2</sup>κ' for torsional angle C4-N9-C1'-H9 - 180°

**Table S4.** The calculated and experimental interatomic distances (Å) and angles (degrees) of G, OxoG and FapyG.

| Parameter             | Calc. Medium Model <sup>a)</sup> |       |       | Calc. Large Model <sup>b)</sup> |       | Experiment <sup>c)</sup> |       |       |       |
|-----------------------|----------------------------------|-------|-------|---------------------------------|-------|--------------------------|-------|-------|-------|
|                       | G                                | OxoG  | FapyG | OxoG                            | OxoG  | G                        | G     | OxoG  | OxoG  |
| C1'-N9                | 1.464                            | 1.461 | 1.440 | 1.455                           | 1.485 | 1.461                    | 1.461 | 1.455 | 1.458 |
| N $\epsilon$ -N9      | 3.629                            | 3.021 | 2.777 | 3.075                           | 2.911 | 4.178                    | 5.175 | 3.366 | 3.027 |
| N $\epsilon$ -N3      | 2.704                            | 3.425 | 3.260 | 3.363                           | 3.261 | 3.510                    | 5.527 | 3.470 | 3.341 |
| N $\epsilon$ -C1'     | 3.289                            | 3.175 | 3.121 | 3.375                           | 3.354 | 4.293                    | 4.199 | 3.370 | 3.172 |
| N7-O <sub>Gly42</sub> | 3.565                            | 2.936 | 2.595 | 3.003                           | 2.790 | 3.199                    | 7.783 | 2.729 | 2.785 |
| $\chi$                | 248.7                            | 272.9 | 287.6 | 288.3                           | 269.5 | 266.3                    | 286.9 | 275.1 | 258.0 |
| $\kappa'$             | 29.9                             | 38.8  | 48.2  | 42.2                            | 41.8  | 0.5                      | -0.3  | 1.9   | 2.8   |

<sup>a)</sup> Calculations employing medium structural model and ONIOM method (see Computational details).

<sup>b)</sup> Calculations employing large structural model and AM1/OPLS\_2005 QM/MM method (left column) and B3LYP/OPLS\_2005 QM/MM method (right column) (see Computational details).

<sup>c)</sup> X-ray structures with PDB ID 3IH7, 1YQK, 1N3C, 2NOZ (from left to right).

**Table S5.** The Wiberg bond orders calculated for pairs of atoms of G, OxoG, and FapyG employing B3LYP-D2/6-31G\*\*/PCM. The interactions of Lys 249 with nucleosides are indicated in parenthesis as follows: C1'-pathway (C1'), N3-pathway (N3), N3-pathway with proton transferred from N $\epsilon$ -ammonium to N3 nitrogen (N3H), N9-pathway (N9), N9-pathway with proton transferred from N $\epsilon$ -ammonium to N9 nitrogen (N9H).

| Pair of atoms                                | G      | G (C1')     | G (N3)     | G (N3H)     | G (N9)     | G (N9H)     |
|----------------------------------------------|--------|-------------|------------|-------------|------------|-------------|
| C1'-N9                                       | 0.8981 | 0.9083      | 0.9125     | 0.8965      | -          | -           |
| N9-C8                                        | 1.1360 | 1.1325      | 1.1158     | 1.1158      | -          | -           |
| N9-C4                                        | 1.1513 | 1.1516      | 1.1589     | 1.1902      | -          | -           |
| N9-H <sup>+</sup> (N $\epsilon$ )            | -      | -           | -          | -           | -          | -           |
| N3-H <sup>+</sup> (N $\epsilon$ )            | -      | -           | 0.1639     | 0.5452      | -          | -           |
| N $\epsilon$ -H <sup>+</sup> (N $\epsilon$ ) | -      | -           | 0.5938     | 0.2085      | -          | -           |
|                                              | OxoG   | OxoG (C1')  | OxoG (N3)  | OxoG (N3H)  | OxoG (N9)  | OxoG (N9H)  |
| C1'-N9                                       | 0.9241 | 0.9224      | 0.9231     | 0.9119      | 0.9052     | -           |
| N9-C8                                        | 1.0265 | 1.0285      | 1.0031     | 0.9867      | 0.9734     | -           |
| N9-C4                                        | 1.1050 | 1.1154      | 1.1180     | 1.1522      | 1.0507     | -           |
| N9-H <sup>+</sup> (N $\epsilon$ )            | -      | -           | -          | -           | 0.0431     | -           |
| N3-H <sup>+</sup> (N $\epsilon$ )            | -      | -           | 0.1394     | 0.5098      | -          | -           |
| N $\epsilon$ -H <sup>+</sup> (N $\epsilon$ ) | -      | -           | 0.6172     | 0.2456      | 0.7074     | -           |
|                                              | FapyG  | FapyG (C1') | FapyG (N3) | FapyG (N3H) | FapyG (N9) | FapyG (N9H) |
| C1'-N9                                       | 0.9713 | 0.9687      | 0.9566     | 0.9466      | 0.9285     | 0.8674      |
| N9-H9                                        | 0.7039 | 0.7073      | 0.6998     | 0.6902      | 0.6986     | 0.6310      |
| N9-C4                                        | 1.2023 | 1.2071      | 1.1346     | 1.1909      | 1.0421     | 0.9530      |
| N9-H <sup>+</sup> (N $\epsilon$ )            | -      | -           | -          | -           | 0.1307     | 0.5111      |
| N3-H <sup>+</sup> (N $\epsilon$ )            | -      | -           | 0.1452     | 0.5467      | -          | -           |
| N $\epsilon$ -H <sup>+</sup> (N $\epsilon$ ) | -      | -           | 0.6086     | 0.2070      | 0.6174     | 0.2281      |

**Table S6.** The NBO atomic charges in e calculated for G employing B3LYP-D2/6-31G\*\*/PCM method. The interactions of Lys 249 with G are indicated in parenthesis as follows: C1'-pathway (C1'), N3-pathway (N3), N3-pathway with proton transferred from Nε-ammonium to N3 nitrogen (N3H).

| Atom | G      | G (C1') | G (N3) | G (N3H) |
|------|--------|---------|--------|---------|
| C1'  | 0.279  | 0.269   | 0.280  | 0.278   |
| N9   | -0.420 | -0.415  | -0.419 | -0.410  |
| C8   | 0.198  | 0.201   | 0.211  | 0.220   |
| C4   | 0.359  | 0.366   | 0.375  | 0.378   |
| N3   | -0.598 | -0.595  | -0.655 | -0.612  |
| N7   | -0.486 | -0.484  | -0.461 | -0.453  |
| C5   | -0.056 | -0.058  | -0.046 | -0.036  |
| O4'  | -0.597 | -0.603  | -0.591 | -0.590  |
| C2'  | -0.504 | -0.495  | -0.496 | -0.498  |
| Nε   | -      | -0.924  | -0.822 | -0.922  |

**Table S7.** The NBO atomic charges in e calculated for OxoG employing B3LYP-D2/6-31G\*\*/PCM method. The interactions of Lys 249 with OxoG are indicated in parenthesis as follows: C1'-pathway (C1'), N3-pathway (N3), N3-pathway with proton transferred from Nε-ammonium to N3 nitrogen (N3H), N9-pathway (N9).

| Atom | OxoG   | OxoG (C1') | OxoG (N3) | OxoG (N3H) | OxoG (N9) |
|------|--------|------------|-----------|------------|-----------|
| C1'  | 0.264  | 0.273      | 0.279     | 0.276      | 0.261     |
| N9   | -0.469 | -0.460     | -0.474    | -0.465     | -0.544    |
| C8   | 0.821  | 0.821      | 0.826     | 0.830      | 0.828     |
| C4   | 0.399  | 0.404      | 0.402     | 0.412      | 0.380     |
| N3   | -0.590 | -0.596     | -0.651    | -0.616     | -0.610    |
| N7   | -0.619 | -0.621     | -0.614    | -0.613     | -0.615    |
| C5   | -0.040 | -0.040     | -0.026    | -0.015     | -0.029    |
| O4'  | -0.605 | -0.608     | -0.598    | -0.596     | -0.595    |
| C2'  | -0.504 | -0.502     | -0.500    | -0.500     | -0.512    |
| Nε   | -      | -0.922     | -0.818    | -0.912     | -0.799    |



**Table S8.** The NBO atomic charges in e calculated for FapyG employing B3LYP-D2/6-31G\*\*/PCM method. The interactions of Lys 249 with FapyG are indicated in parenthesis as follows: C1'-pathway (C1'), N3-pathway (N3), N3-pathway with proton transferred from Nε-ammonium to N3 nitrogen (N3H), N9-pathway (N9), N9-pathway with proton transferred from Nε-ammonium to N9 nitrogen (N9H).

| Atoms | FapyG  | FapyG (C1') | FapyG (N3) | FapyG (N3H) | FapyG (N9) | FapyG (N9H) |
|-------|--------|-------------|------------|-------------|------------|-------------|
| C1'   | 0.244  | 0.239       | 0.251      | 0.253       | 0.250      | 0.275       |
| N9    | -0.647 | -0.645      | -0.705     | -0.672      | -0.745     | -0.707      |
| C8    | 0.508  | 0.507       | 0.520      | 0.525       | 0.521      | 0.527       |
| C4    | 0.431  | 0.433       | 0.424      | 0.438       | 0.405      | 0.383       |
| N3    | -0.603 | -0.599      | -0.657     | -0.614      | -0.620     | -0.598      |
| N7    | -0.622 | -0.622      | -0.626     | -0.627      | -0.626     | -0.617      |
| C5    | -0.084 | -0.086      | -0.048     | -0.041      | -0.037     | -0.011      |
| O4'   | -0.607 | -0.610      | -0.602     | -0.604      | -0.595     | -0.595      |
| C2'   | -0.500 | -0.495      | -0.505     | -0.502      | -0.511     | -0.512      |
| Nε    | -      | -0.917      | -0.817     | -0.923      | -0.814     | -0.910      |

**Table S9.** The  $f, f^+, f^2$  Fukui indices calculated for G employing B3LYP-D2/6-31G\*\*/PCM method. The interactions of Lys 249 with G are indicated in parenthesis as follows: C1'-pathway (C1'), N3-pathway (N3), N3-pathway with proton transferred from N $\epsilon$ -ammonium to N3 nitrogen (N3H).

| Atoms        | G      | G (C1') | G (N3) | G (N3H) |
|--------------|--------|---------|--------|---------|
| $f$          |        |         |        |         |
| C1'          | -0.009 | -0.008  | -0.007 | -0.004  |
| N9           | 0.011  | 0.011   | 0.006  | 0.004   |
| N3           | 0.130  | 0.123   | 0.091  | 0.039   |
| N $\epsilon$ | -      | -0.001  | 0.002  | -0.001  |
| $f^+$        |        |         |        |         |
| C1'          | -0.009 | -0.001  | -0.001 | -0.003  |
| N9           | 0.031  | 0.008   | 0.017  | 0.015   |
| N3           | 0.026  | 0.006   | 0.023  | 0.054   |
| N $\epsilon$ | -      | 0.004   | 0.001  | -0.005  |
| $f^2$        |        |         |        |         |
| C1'          | 0.000  | 0.007   | 0.006  | 0.001   |
| N9           | 0.020  | -0.003  | 0.011  | 0.011   |
| N3           | -0.104 | -0.117  | -0.068 | 0.015   |
| N $\epsilon$ | -      | 0.005   | -0.001 | -0.004  |

**Table S10.** The Fukui indices  $f, f^+, f^2$  calculated for OxoG employing B3LYP-D2/6-31G\*\*/PCM method. The interactions of Lys 249 with OxoG are indicated in parenthesis as follows: C1'-pathway (C1'), N3-pathway (N3), N3-pathway with proton transferred from N $\epsilon$ -ammonium to N3 nitrogen (N3H), N9-pathway (N9).

| Atoms        | OxoG   | OxoG (C1') | OxoG (N3) | OxoG (N3H) | OxoG (N9) |
|--------------|--------|------------|-----------|------------|-----------|
| $f$          |        |            |           |            |           |
| C1'          | -0.007 | -0.008     | -0.009    | -0.008     | -0.007    |
| N9           | 0.035  | 0.038      | 0.043     | 0.047      | 0.026     |
| N3           | 0.075  | 0.066      | 0.053     | 0.025      | 0.093     |
| N $\epsilon$ | -      | -0.006     | 0.002     | -0.001     | 0.001     |
| $f^+$        |        |            |           |            |           |
| C1'          | -0.004 | -0.001     | -0.001    | -0.003     | -0.003    |
| N9           | 0.022  | 0.010      | 0.014     | 0.025      | 0.009     |
| N3           | 0.027  | 0.007      | 0.007     | 0.004      | 0.013     |
| N $\epsilon$ | -      | 0.003      | 0.001     | -0.003     | 0.001     |
| $f^2$        |        |            |           |            |           |
| C1'          | 0.003  | 0.007      | 0.008     | 0.005      | 0.004     |
| N9           | -0.013 | -0.028     | -0.029    | -0.022     | -0.017    |
| N3           | -0.048 | -0.059     | -0.046    | -0.021     | -0.080    |
| N $\epsilon$ | -      | 0.009      | -0.001    | -0.002     | 0.000     |

**Table S11.** The Fukui indices  $f^+$ ,  $f$ ,  $f^2$  calculated for FapyG employing B3LYP-D2/6-31G\*\*/PCM method. The interactions of Lys 249 with FapyG are indicated in parenthesis as follows: C1'-pathway (C1'), N3-pathway (N3), N3-pathway with proton transferred from N $\epsilon$ -ammonium to N3 nitrogen (N3H), N9-pathway (N9), N9-pathway with proton transferred from N $\epsilon$ -ammonium to N9 nitrogen (N9H).

| Atoms        | FapyG  | FapyG (C1') | FapyG (N3) | FapyG (N3H) | FapyG (N9) | FapyG (N9H) |
|--------------|--------|-------------|------------|-------------|------------|-------------|
| $f$          |        |             |            |             |            |             |
| C1'          | -0.011 | -0.011      | -0.011     | -0.011      | -0.007     | -0.002      |
| N9           | 0.113  | 0.116       | 0.112      | 0.124       | 0.046      | 0.000       |
| N3           | 0.044  | 0.042       | 0.042      | 0.013       | 0.085      | 0.100       |
| N $\epsilon$ | -      | -0.007      | 0.002      | -0.001      | 0.005      | 0.008       |
| $f^+$        |        |             |            |             |            |             |
| C1'          | -0.002 | -0.001      | -0.003     | -0.003      | -0.003     | 0.003       |
| N9           | 0.050  | 0.024       | 0.026      | 0.044       | 0.010      | -0.006      |
| N3           | 0.010  | 0.004       | 0.001      | -0.005      | 0.008      | 0.022       |
| N $\epsilon$ | -      | 0.001       | 0.000      | -0.006      | 0.001      | -0.005      |
| $f^2$        |        |             |            |             |            |             |
| C1'          | 0.009  | 0.010       | 0.008      | 0.008       | 0.004      | 0.005       |
| N9           | -0.063 | -0.092      | -0.086     | -0.080      | -0.036     | -0.006      |
| N3           | -0.034 | -0.038      | -0.041     | -0.018      | -0.077     | -0.078      |
| N $\epsilon$ | -      | 0.008       | -0.002     | -0.005      | -0.004     | -0.013      |

**Table S12.** The Hardness  $\eta$ <sup>a)</sup> in (eV) calculated for G, OxoG and FapyG. The numbering of atoms is according to IUPAC.

| Substrates | $\eta$ (eV) |
|------------|-------------|
| G          | 2.74        |
| OxoG       | 2.46        |
| FapyG      | 2.39        |

<sup>a)</sup> The global reactivity descriptor of a molecule called chemical hardness  $\eta = \frac{1}{2}(\epsilon_{LUMO} - \epsilon_{HOMO})$  was calculated employing the B3LYP-D2/6-31G\*\*/PCM method.  $\epsilon_{LUMO}$  and  $\epsilon_{HOMO}$  are electronic energies of lowest unoccupied and highest occupied molecular orbital.

**Table S13.** The interaction energies in kcal/mol of G, OxoG and FapyG interacting with Lys 249 calculated employing small model and B3LYP-D2/PCM method including the BSSE correction that was calculated in gas phase.<sup>a)</sup>

| Complexes  | $\Delta E_{\text{int}}^{\text{b)}$ | $\Delta E_{\text{int}} \text{ (BSSE)}^{\text{b)}$ | $\Delta E_{\text{int}}^{\text{c)}$ | $\Delta E_{\text{int}} \text{ (BSSE)}^{\text{c)}$ |
|------------|------------------------------------|---------------------------------------------------|------------------------------------|---------------------------------------------------|
| G (N3)     | -9.1                               | -8.3                                              | -10.4                              | -8.7                                              |
| OxoG (N3)  | -8.5                               | -7.6                                              | -9.4                               | -7.9                                              |
| OxoG (N9)  | -3.6                               | -2.5                                              | -4.4                               | -2.4                                              |
| FapyG (N3) | -12.0                              | -11.0                                             | -12.8                              | -11.1                                             |
| FapyG (N9) | -10.9                              | -9.8                                              | -11.8                              | -9.8                                              |

<sup>a)</sup> The interaction energy for Lys249 and nucleoside employing small model was computed using the following protocol: (i) the geometry optimization of complexes and monomers using the B3LYP-D2/6-31G(d,p)/PCM=diethylether method keeping the constraint defined for small model, (ii) the energy calculation for the complex ( $E_{\text{complex}}$ ) and the monomers ( $E_1, E_2$ ) employing the B3LYP-D2/6-311++G(d,p)/PCM=diethylether method, (iii) the BSSE calculation employing the B3LYP-D2/6-311++G(d,p) method, (iv) the interaction energy calculation:  $\Delta E_{\text{int}} = E_{\text{complex}} - (E_1 + E_2)$ ,  $\Delta E_{\text{int}} \text{ (BSSE)} = \Delta E_{\text{int}} + E_{\text{BSSE}}$ . <sup>b)</sup> Calculated with 6-311++G(d,p) basis set. <sup>c)</sup> Calculated with aug-cc-pVDZ basis set.

**Table S14.** The reaction energies  $\Delta E_r$ , the activation energies  $\Delta E^\ddagger$ , the Gibbs free reaction energies  $\Delta G_r$ , and the Gibbs free activation energies  $\Delta G^\ddagger$  in kcal/mol calculated employing small model and B3LYP-D2/6-31G\*\*/PCM method for proton transfer from Lys 249 to nucleobase owing to N3-pathway and N9-pathway.

| Nucleoside<br>(pathway) <sup>a)</sup> | $\Delta E_r$ <sup>b)</sup> | $\Delta E^\ddagger$ <sup>c)</sup> | $\Delta G_r$ <sup>b)</sup> | $\Delta G^\ddagger$ <sup>c)</sup> |
|---------------------------------------|----------------------------|-----------------------------------|----------------------------|-----------------------------------|
| G (N3)                                | 1.7                        | 2.4                               | -0.4                       | 0.1                               |
| OxoG (N3)                             | 3.8                        | 3.9                               | 3.7                        | 1.3                               |
| FapyG (N3)                            | 2.4                        | 2.9                               | 2.0                        | 1.5                               |
| FapyG (N9)                            | 2.8                        | 3.1                               | 2.0                        | 1.3                               |

<sup>b)</sup> The N3-pathway and N9-pathway depicted in Figure S4 and Figure S5 are indicated in parenthesis. <sup>b)</sup> The energy of complex with proton at nucleobase minus energy of complex with proton at Lys 249. <sup>c)</sup> The energy of transition state of proton transfer minus energy of complex with proton at Lys 249.

**Table S15.** The electronic and Gibbs free activation and reaction energies in kcal/mol calculated for cleavage of N-glycosidic bond with S<sub>N</sub>2 reaction mechanism initiated by C1'-pathway as depicted in Figure S3. The calculations employing B3LYP-D2/6-31G\*\*/PCM method.

| Complexes | $\Delta E^\ddagger$ | $\Delta G^\ddagger$ | $\Delta E_r$ | $\Delta G_r$ |
|-----------|---------------------|---------------------|--------------|--------------|
| G         | 29.1                | 30.7                | 9.3          | 14.7         |
| OxoG      | 33.8                | 32.0                | 11.5         | 12.9         |
| FapyG     | 36.6                | 35.2                | 26.0         | 25.5         |



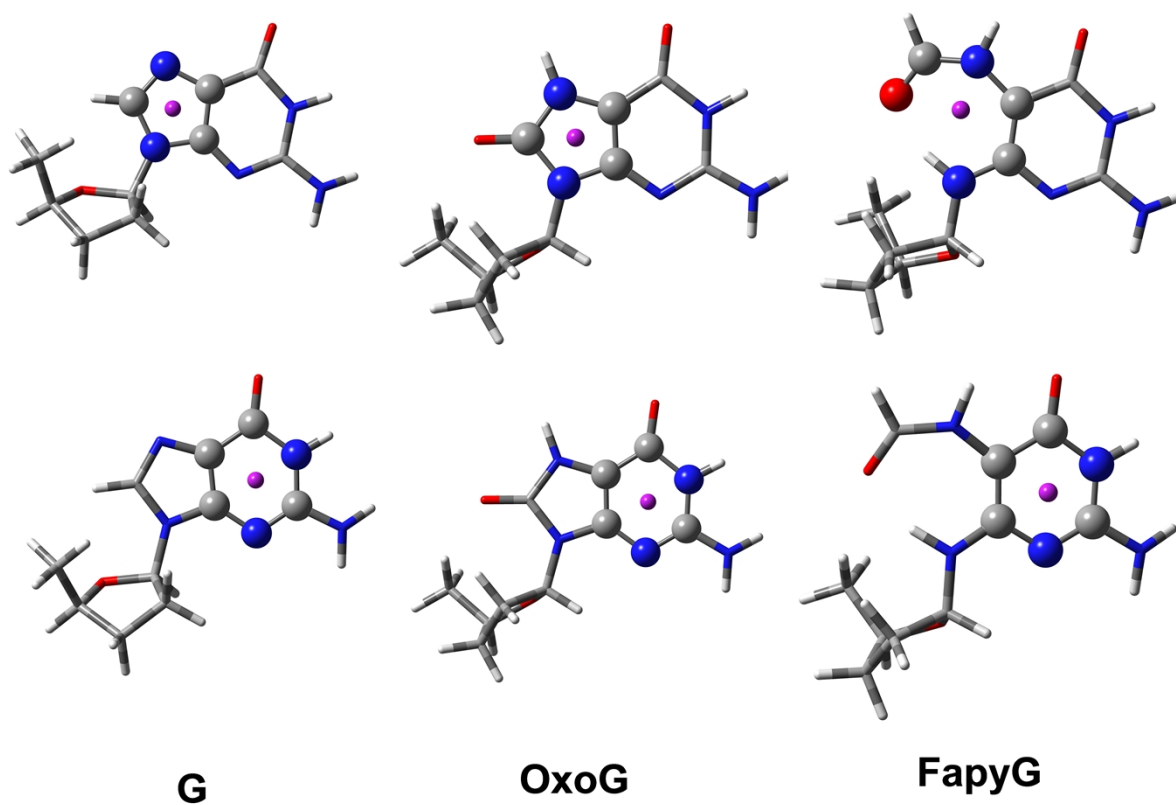

**Figure S1.** The NICSs were calculated at the centre of mass of 5 and 6-membered ring of G, OxoG and FapyG indicated by purple ball.

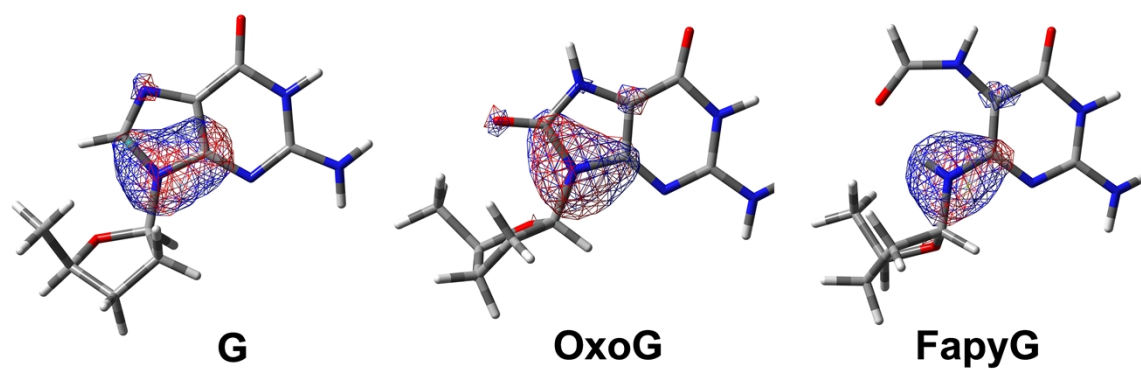

**Figure S2.** The NLMO of lone-pair electrons at N9 nitrogen calculated for G, OxoG and FapyG.

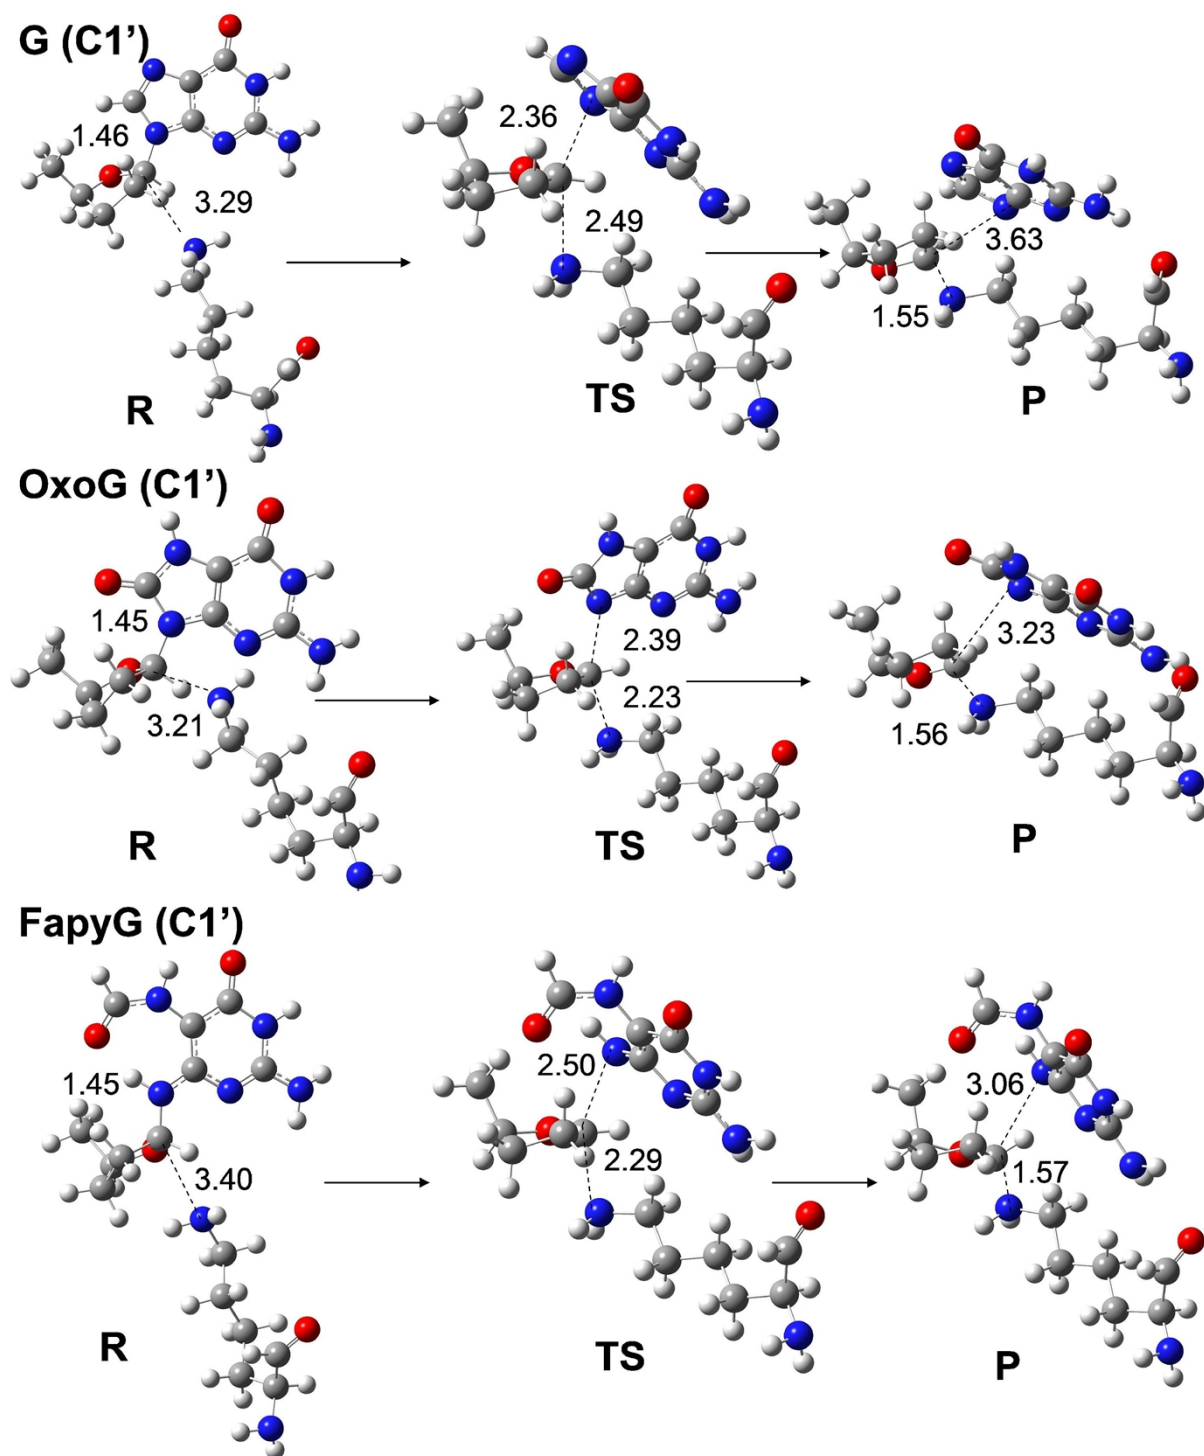

**Figure S3.** The reactant (R), transition state (TS) and product (P) of N-glycosidic bond cleavage of G, OxoG and FapyG employing C1'-pathway. The C1'-N9 and C1'-Nε distances between atoms indicated by dashed lines are in Å.

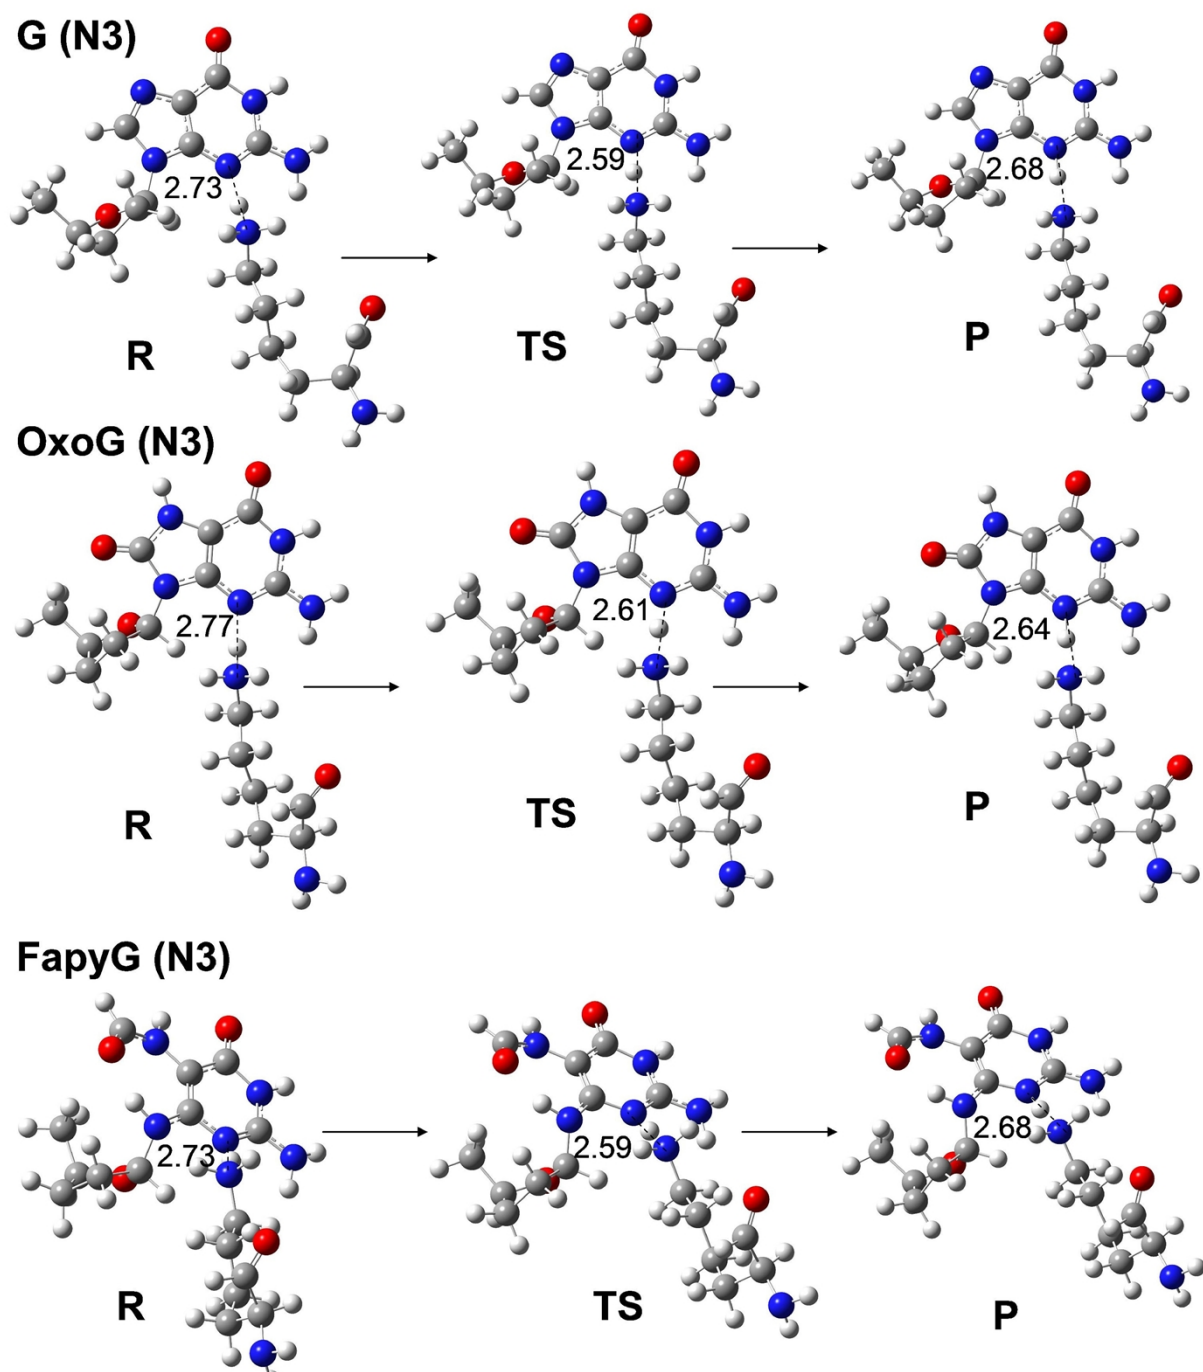

**Figure S4.** The reactant (R), transition state (TS), and product (P) calculated for proton addition to nitrogen N3 of G, OxoG and FapyG employing Lys 249. The N3-N $\epsilon$  distances between atoms indicated by dashed line are in Å.

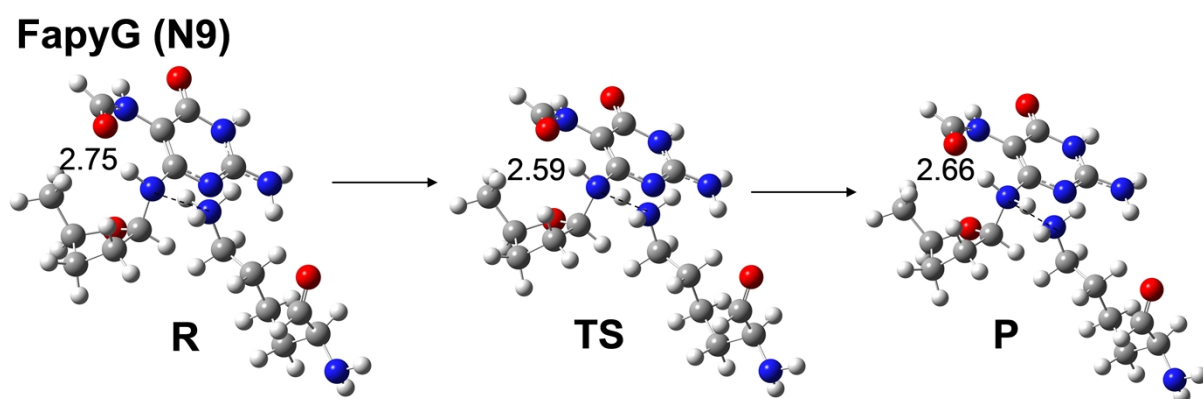

**Figure S5.** The reactant (R), transition state (TS), and product (P) calculated for proton addition to glycosidic nitrogen N9 of FapyG owing to deprotonation of Lys 249. The N9-N $\epsilon$  distances between atoms indicated by dashed lines are in Å.

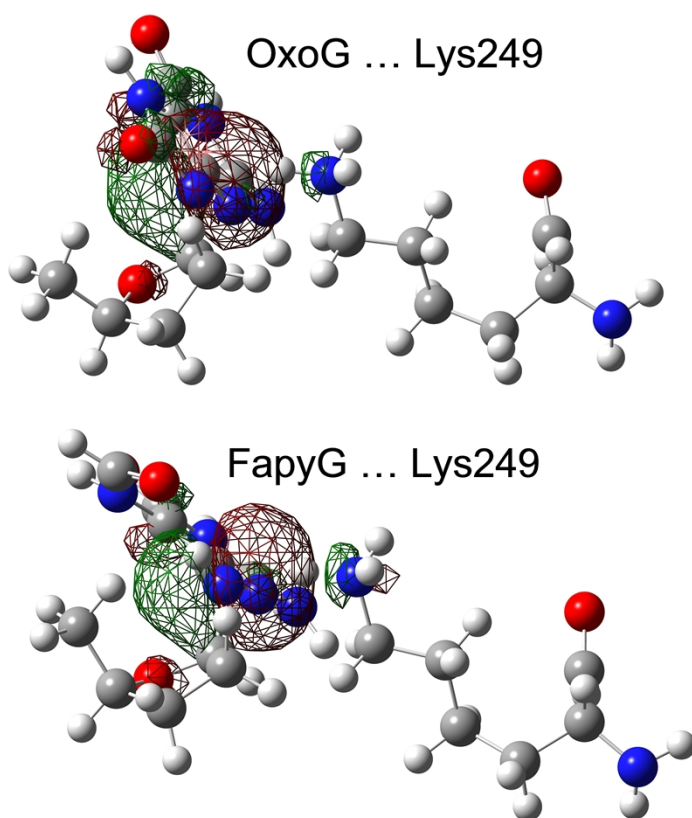

**Figure S6.** The NLMO of lone-pair electrons at N9 nitrogen calculated for N9-pathway of OxoG and FapyG.

## Optimized Geometries (Small model)

### G

|   |             |             |             |
|---|-------------|-------------|-------------|
| C | 22.85767200 | 23.29809500 | 37.87293800 |
| C | 22.97834600 | 24.74550200 | 37.40633800 |
| O | 23.40560800 | 24.80226300 | 36.01987900 |
| C | 21.64657100 | 25.50707000 | 37.41416700 |
| C | 21.03820400 | 25.09308900 | 36.06724700 |
| C | 22.28581100 | 24.94200000 | 35.17240800 |
| N | 22.19763000 | 23.77317200 | 34.28817900 |
| C | 22.82006300 | 22.54583100 | 34.42005200 |
| N | 22.48838700 | 21.69487800 | 33.47631900 |
| C | 21.59899300 | 22.39438400 | 32.68316900 |
| C | 20.88385300 | 21.99622500 | 31.50349400 |
| O | 20.87792000 | 20.93077600 | 30.89718600 |
| N | 20.07181800 | 23.07695200 | 31.03726400 |
| C | 19.96411300 | 24.32329900 | 31.60729700 |
| N | 19.08128400 | 25.19201800 | 31.02805500 |
| N | 20.62203100 | 24.68268900 | 32.68948400 |
| C | 21.40748800 | 23.68750600 | 33.17508400 |
| H | 23.51268800 | 22.36819800 | 35.22811900 |
| H | 22.62111600 | 23.26583900 | 38.94228700 |
| H | 22.06476700 | 22.77669500 | 37.32586800 |
| H | 23.75479700 | 25.26064700 | 37.97960200 |
| H | 21.01563500 | 25.24136400 | 38.26673300 |
| H | 20.53072100 | 24.12753900 | 36.14670600 |
| H | 20.33440000 | 25.81750200 | 35.65346000 |
| H | 22.42586300 | 25.81113600 | 34.52081000 |
| H | 19.16864200 | 26.14788500 | 31.34382200 |
| H | 23.80039500 | 22.76601500 | 37.70931000 |
| H | 21.83360700 | 26.58544600 | 37.43738500 |
| H | 19.51047800 | 22.85150300 | 30.22438800 |
| H | 18.88061000 | 25.08484700 | 30.04383300 |

### G (C1')

|    |             |             |             |
|----|-------------|-------------|-------------|
| C* | 22.98299200 | 25.18401500 | 36.84898400 |
| O  | 22.69765800 | 24.30372100 | 35.73430600 |
| C* | 21.67600300 | 25.24698500 | 37.63902000 |
| C  | 21.13101900 | 23.82669900 | 37.45601700 |
| C  | 21.53571200 | 23.52875700 | 36.00634200 |
| N  | 21.84232900 | 22.12123200 | 35.77030900 |
| C  | 22.99734100 | 21.44578300 | 36.11670900 |
| N  | 22.95880000 | 20.16665800 | 35.82577700 |
| C  | 21.70917500 | 19.98456700 | 35.26352400 |
| C  | 21.08290100 | 18.79842900 | 34.75318600 |
| O  | 21.49451700 | 17.64499700 | 34.69050400 |
| N  | 19.77473800 | 19.10754700 | 34.26757000 |
| C  | 19.17495800 | 20.34439800 | 34.27334300 |
| N  | 17.88934600 | 20.40790100 | 33.80724600 |
| N  | 19.75390900 | 21.42771300 | 34.74450900 |
| C  | 21.00272200 | 21.18950500 | 35.22074000 |
| N* | 13.56100000 | 29.92299800 | 34.24600500 |
| C* | 14.57800000 | 28.98100300 | 33.82998300 |
| C* | 14.09301200 | 27.55499700 | 34.08701000 |
| O* | 14.09599300 | 26.72300200 | 33.16999800 |
| C  | 15.94598400 | 29.25100500 | 34.50632300 |
| C  | 17.10791900 | 28.31165100 | 34.14481300 |
| C  | 17.15438800 | 27.01602800 | 34.96805300 |
| C  | 18.51531200 | 26.31464400 | 34.86429300 |
| N  | 18.66705100 | 25.11026800 | 35.68719800 |
| H  | 15.79734400 | 29.24435400 | 35.59626300 |
| H  | 16.20541500 | 30.28256700 | 34.23571300 |
| H  | 18.04756400 | 28.85373100 | 34.31381500 |
| H  | 17.07633200 | 28.07242100 | 33.07349300 |
| H  | 16.97089100 | 27.25667800 | 36.02599600 |

|   |             |             |             |
|---|-------------|-------------|-------------|
| H | 16.36261500 | 26.32412700 | 34.65598000 |
| H | 19.29887700 | 27.02660400 | 35.15705800 |
| H | 18.71565200 | 26.04085900 | 33.82112500 |
| H | 18.38386800 | 25.32078500 | 36.64234000 |
| H | 18.03199900 | 24.38628800 | 35.35843100 |
| H | 14.70037400 | 29.05002400 | 32.74412800 |
| H | 13.80723800 | 30.84866700 | 33.90346900 |
| H | 13.55617500 | 29.99490800 | 35.26264100 |
| C | 24.15791700 | 24.63943600 | 37.65687400 |
| H | 23.25013400 | 26.15478600 | 36.41770800 |
| H | 21.82984500 | 25.52397300 | 38.68600200 |
| H | 20.98888100 | 25.96157000 | 37.17389600 |
| H | 21.62232600 | 23.12101100 | 38.13384400 |
| H | 20.04957900 | 23.75245900 | 37.57876500 |
| H | 20.72305700 | 23.79822300 | 35.32730500 |
| H | 17.55983100 | 21.34722500 | 33.63255200 |
| H | 17.60024100 | 19.72615700 | 33.11970600 |
| H | 19.26050600 | 18.30589900 | 33.92164800 |
| H | 23.83084500 | 21.97521800 | 36.55453800 |
| H | 13.74359600 | 27.30438200 | 35.10919400 |
| H | 24.45707300 | 25.35943000 | 38.42715300 |
| H | 23.88503800 | 23.69985100 | 38.15049500 |
| H | 25.01430500 | 24.45268700 | 37.00107700 |

### G (C1') TS

|    |             |             |             |
|----|-------------|-------------|-------------|
| C* | 22.98300000 | 25.18400000 | 36.84900000 |
| O  | 22.55700600 | 25.32766800 | 35.42794600 |
| C* | 21.67600000 | 25.24700000 | 37.63900000 |
| C  | 20.61287900 | 24.81219500 | 36.61216000 |
| C  | 21.28342100 | 25.15649000 | 35.31616500 |
| N  | 20.93707200 | 23.07848700 | 34.25186500 |
| C  | 21.21217100 | 22.00084700 | 35.05426000 |
| N  | 20.17526700 | 21.36641600 | 35.59748400 |
| C  | 19.10035800 | 22.08459900 | 35.10359000 |
| C  | 17.69981900 | 21.95445800 | 35.36152800 |
| O  | 17.07603200 | 21.14580300 | 36.05016300 |
| N  | 16.97832600 | 22.98582800 | 34.68202500 |
| C  | 17.52875000 | 23.99277400 | 33.92312700 |
| N  | 16.66525400 | 24.96057500 | 33.46768600 |
| N  | 18.81409100 | 24.10142800 | 33.68496600 |
| C  | 19.57259200 | 23.12324200 | 34.28241200 |
| H  | 22.23605200 | 21.68549100 | 35.22757400 |
| N* | 13.56100000 | 29.92300000 | 34.24600000 |
| C* | 14.57800000 | 28.98100000 | 33.83000000 |
| C* | 14.09300000 | 27.55500000 | 34.08700000 |
| O* | 14.09600000 | 26.72300000 | 33.17000000 |
| C  | 15.92133000 | 29.22226400 | 34.55183500 |
| C  | 17.05822000 | 28.29014500 | 34.14833500 |
| C  | 18.32563000 | 28.54094700 | 34.96708300 |
| C  | 19.36795600 | 27.45505100 | 34.71745700 |
| N  | 20.55763800 | 27.51890500 | 35.57594000 |
| H  | 15.74231500 | 29.12833100 | 35.63389000 |
| H  | 16.20134100 | 30.26918600 | 34.37315100 |
| H  | 17.27376300 | 28.40380300 | 33.07681400 |
| H  | 16.75079900 | 27.24872100 | 34.29423200 |
| H  | 18.74271600 | 29.53255100 | 34.74521200 |
| H  | 18.06704900 | 28.53627700 | 36.03652100 |
| H  | 19.70589200 | 27.48050500 | 33.67498900 |
| H  | 18.89839200 | 26.47319000 | 34.85619400 |
| H  | 21.17480100 | 28.27232600 | 35.28466800 |
| H  | 20.28416100 | 27.71326600 | 36.53671000 |
| H  | 14.71651600 | 29.05715600 | 32.74694100 |
| H  | 13.79649500 | 30.84563000 | 33.88919600 |
| H  | 13.56557900 | 30.00605800 | 35.26146300 |
| C  | 23.73683200 | 23.87277600 | 36.97818700 |
| H  | 23.63579100 | 26.04162100 | 37.02010500 |



|   |             |             |             |
|---|-------------|-------------|-------------|
| H | 21.70733400 | 24.58672200 | 38.50788200 |
| H | 21.48443700 | 26.26808700 | 37.97740700 |
| H | 20.42971100 | 23.73424500 | 36.66028500 |
| H | 19.65432100 | 25.32219000 | 36.71121300 |
| H | 20.82411900 | 25.36477700 | 34.36656600 |
| H | 17.03947400 | 25.54072800 | 32.73112900 |
| H | 15.67742800 | 24.76367800 | 33.38304500 |
| H | 15.97736700 | 22.96432400 | 34.83482400 |
| H | 24.15051000 | 23.79463300 | 37.98877000 |
| H | 23.05842000 | 23.03145100 | 36.80872100 |
| H | 24.55710800 | 23.82327200 | 36.25623700 |
| H | 13.74901900 | 27.30402300 | 35.11046600 |

**G (C1') P**

|    |             |             |             |
|----|-------------|-------------|-------------|
| C* | 22.98300000 | 25.18400000 | 36.84900000 |
| O  | 22.57855600 | 25.75516100 | 35.54401300 |
| C* | 21.67600000 | 25.24700000 | 37.63900000 |
| C  | 20.64669500 | 24.86158800 | 36.57311600 |
| C  | 21.20992800 | 25.56824500 | 35.34507900 |
| N  | 19.47492500 | 24.31132400 | 32.41587700 |
| C  | 20.54757700 | 23.53210200 | 32.74699500 |
| N  | 20.45623000 | 22.77967800 | 33.85388000 |
| C  | 19.18417500 | 23.08034200 | 34.28771700 |
| C  | 18.49861400 | 22.67825000 | 35.47076200 |
| O  | 18.87048900 | 21.97072100 | 36.41551900 |
| N  | 17.20566600 | 23.27293500 | 35.52134100 |
| C  | 16.67992100 | 24.14351100 | 34.58604400 |
| N  | 15.42062500 | 24.64574400 | 34.88488800 |
| N  | 17.32758700 | 24.54907600 | 33.52851900 |
| C  | 18.59228400 | 24.00871700 | 33.39910500 |
| H  | 21.44592400 | 23.53213100 | 32.13541800 |
| N* | 13.56100000 | 29.92300000 | 34.24600000 |
| C* | 14.57800000 | 28.98100000 | 33.83000000 |
| C* | 14.09300000 | 27.55500000 | 34.08700000 |
| O* | 14.09600000 | 26.72300000 | 33.17000000 |
| C  | 15.97205600 | 29.13509400 | 34.51338600 |
| C  | 16.95142100 | 27.99181000 | 34.18566900 |
| C  | 18.35986800 | 28.19206700 | 34.77712500 |
| C  | 19.15287100 | 26.89440300 | 34.63585100 |
| N  | 20.54867200 | 26.96955000 | 35.21597000 |
| H  | 15.81732500 | 29.18289100 | 35.60112000 |
| H  | 16.38998700 | 30.10306200 | 34.20752700 |
| H  | 17.02707700 | 27.86357700 | 33.09973600 |
| H  | 16.55353100 | 27.04445500 | 34.56633100 |
| H  | 18.87266200 | 29.01978200 | 34.27127100 |
| H  | 18.27790000 | 28.45638800 | 35.84084900 |
| H  | 19.27078300 | 26.57187200 | 33.59971100 |
| H  | 18.64865100 | 26.08524400 | 35.16213300 |
| H  | 21.15196200 | 27.54462800 | 34.62108500 |
| H  | 20.53955200 | 27.41591600 | 36.13834000 |
| H  | 14.70485000 | 29.05409600 | 32.74561400 |
| H  | 13.79358700 | 30.84830500 | 33.89345900 |
| H  | 13.55701200 | 30.00186700 | 35.26196300 |
| C  | 23.53135200 | 23.78309200 | 36.62768300 |
| H  | 23.75230200 | 25.85368300 | 37.24162500 |
| H  | 21.66767800 | 24.56769700 | 38.49522700 |
| H  | 21.51068400 | 26.26626100 | 38.00918500 |
| H  | 20.64379800 | 23.78718900 | 36.39130700 |
| H  | 19.62239300 | 25.15734800 | 36.80934400 |
| H  | 21.00352800 | 25.08763900 | 34.39035500 |
| H  | 14.97484000 | 25.09512800 | 34.08899900 |
| H  | 14.80141400 | 23.99069000 | 35.34753100 |
| H  | 16.66934600 | 23.04613900 | 36.34980800 |
| H  | 23.83656000 | 23.34492800 | 37.58433200 |
| H  | 22.77504200 | 23.14085700 | 36.16498200 |
| H  | 24.40148800 | 23.82226600 | 35.96556400 |

H 13.78295400 27.29011200 35.11677800

**G (N3)**

C 24.01577000 24.23864000 37.45217000  
C\* 22.98298700 25.18398600 36.84898400  
O 22.59087300 24.72212700 35.52615200  
C\* 21.67601300 25.24701700 37.63901700  
C 20.90221900 24.06139300 37.04994500  
C 21.32356800 24.10596800 35.56974400  
N 21.40593700 22.78458400 34.95228600  
C 22.36899000 21.82016600 35.21061900  
N 22.21214900 20.73276700 34.49965000  
C 21.09437700 20.98314500 33.73020700  
C 20.44861800 20.16102900 32.74466400  
O 20.70877100 19.03554300 32.35491100  
N 19.33589800 20.86793400 32.16962100  
C 18.90218300 22.11627000 32.50157100  
N 17.79059500 22.59164100 31.87906000  
N 19.49331400 22.85184700 33.43650100  
C 20.58584200 22.25135600 33.99539000  
H 23.16256600 22.01171100 35.91739000  
N\* 13.56100100 29.92300500 34.24599200  
C\* 14.57800100 28.98099700 33.83004000  
C\* 14.09299300 27.55500400 34.08695900  
O\* 14.09600500 26.72299100 33.17000800  
C 15.87511300 29.23389100 34.63437700  
C 17.05438500 28.33897100 34.21280600  
C 17.07387200 26.97090000 34.91265100  
C 18.07567100 26.02929600 34.25882400  
N 17.96527800 24.64128700 34.82760800  
H 15.66265400 29.12452300 35.70551000  
H 16.14374600 30.28459600 34.47206000  
H 17.99751200 28.85409200 34.42475100  
H 17.01492300 28.18862300 33.12595300  
H 17.31108800 27.09681300 35.97630700  
H 16.08883800 26.49820700 34.85467300  
H 19.11020700 26.35154100 34.40088800  
H 17.88453200 25.94114900 33.18684900  
H 18.22603500 24.62887100 35.81625500  
H 18.59270700 23.93921900 34.28257200  
H 16.99839600 24.30827000 34.77328800  
H 14.83073900 29.01913700 32.75811300  
H 13.94101600 30.86610700 34.24822100  
H 12.78321200 29.91789500 33.59193800  
H 24.43039500 24.67306600 38.36818500  
H 23.56443500 23.27329000 37.70865600  
H 23.42486600 26.17407400 36.70429200  
H 21.83252000 25.15885000 38.71700500  
H 21.23499800 23.11670800 37.48917100  
H 19.81882000 24.12306900 37.18726900  
H 20.61771200 24.67668300 34.95320200  
H 17.69048800 23.59506900 31.83003600  
H 24.83249200 24.06822500 36.74438400  
H 21.15298000 26.18750400 37.43703600  
H 18.85766000 20.35514200 31.43706900  
H 17.43586900 22.09486200 31.07429600  
H 13.73370000 27.32179200 35.10838300

**G (N3) TS**

C 24.00068700 24.20551700 37.42302400  
C\* 22.98300000 25.18400000 36.84900000  
O 22.57756100 24.76475400 35.51303600  
C\* 21.67600000 25.24700000 37.63900000  
C 20.88864700 24.08258500 37.02707300

|    |             |             |             |
|----|-------------|-------------|-------------|
| C  | 21.30537800 | 24.16362900 | 35.54787500 |
| N  | 21.38372800 | 22.85196000 | 34.89497000 |
| C  | 22.39922900 | 21.91933300 | 35.05480900 |
| N  | 22.22556400 | 20.84111400 | 34.33364300 |
| C  | 21.04253400 | 21.06207100 | 33.66208400 |
| C  | 20.35706800 | 20.23499200 | 32.70662400 |
| O  | 20.62725400 | 19.13189500 | 32.27361000 |
| N  | 19.17442100 | 20.91057300 | 32.22272500 |
| C  | 18.70723900 | 22.12222900 | 32.60838900 |
| N  | 17.54763700 | 22.57486400 | 32.09208200 |
| N  | 19.35355000 | 22.85670000 | 33.52182300 |
| C  | 20.51621300 | 22.30209900 | 33.99969500 |
| H  | 23.23811000 | 22.12941800 | 35.70088000 |
| N* | 13.56100000 | 29.92300000 | 34.24600000 |
| C* | 14.57800000 | 28.98100000 | 33.83000000 |
| C* | 14.09300000 | 27.55500000 | 34.08700000 |
| O* | 14.09600000 | 26.72300000 | 33.17000000 |
| C  | 15.87895900 | 29.23289900 | 34.62774500 |
| C  | 17.05139700 | 28.33114500 | 34.20062900 |
| C  | 17.08165700 | 26.96949700 | 34.91124400 |
| C  | 18.05685900 | 26.00316200 | 34.24602300 |
| N  | 17.98582400 | 24.63092800 | 34.82549200 |
| H  | 15.67152500 | 29.12527100 | 35.70012000 |
| H  | 16.14771900 | 30.28335300 | 34.46225900 |
| H  | 17.99828700 | 28.84764500 | 34.39307200 |
| H  | 16.99717900 | 28.17109500 | 33.11543800 |
| H  | 17.34827900 | 27.10433500 | 35.96728900 |
| H  | 16.09188000 | 26.50220500 | 34.89037500 |
| H  | 19.09211700 | 26.34687000 | 34.33659700 |
| H  | 17.82795300 | 25.91830600 | 33.17854800 |
| H  | 18.26373200 | 24.65668200 | 35.80735000 |
| H  | 18.72267200 | 23.73845600 | 34.14563000 |
| H  | 17.01386000 | 24.31312000 | 34.82782600 |
| H  | 14.82737500 | 29.01857600 | 32.75723000 |
| H  | 13.94242800 | 30.86553800 | 34.25122100 |
| H  | 12.78510500 | 29.92062600 | 33.58967700 |
| H  | 24.41914000 | 24.60559000 | 38.35273500 |
| H  | 23.53591300 | 23.23873500 | 37.64816000 |
| H  | 23.44025100 | 26.16983800 | 36.72722600 |
| H  | 21.83009100 | 25.13559300 | 38.71516400 |
| H  | 21.21628500 | 23.12473800 | 37.44097400 |
| H  | 19.80766500 | 24.15326200 | 37.16973200 |
| H  | 20.59859600 | 24.75208600 | 34.94994800 |
| H  | 17.35467300 | 23.56458500 | 32.12430800 |
| H  | 24.81767800 | 24.04745600 | 36.71242600 |
| H  | 21.16385300 | 26.19690800 | 37.45390900 |
| H  | 18.66657100 | 20.39284000 | 31.51352700 |
| H  | 17.10201000 | 22.06415500 | 31.34360100 |
| H  | 13.73366700 | 27.32165900 | 35.10827900 |

**G (N3H)**

|    |             |             |             |
|----|-------------|-------------|-------------|
| C  | 24.00983300 | 24.22168100 | 37.43402500 |
| C* | 22.98299900 | 25.18400300 | 36.84899900 |
| O  | 22.57688700 | 24.74613600 | 35.51898800 |
| C* | 21.67600000 | 25.24699600 | 37.63900100 |
| C  | 20.90014500 | 24.06291500 | 37.04857100 |
| C  | 21.31759100 | 24.12231000 | 35.56903400 |
| N  | 21.42816200 | 22.79462500 | 34.94435100 |
| C  | 22.48210500 | 21.90201900 | 35.09082400 |
| N  | 22.33083900 | 20.80774500 | 34.38867900 |
| C  | 21.12490400 | 20.97401000 | 33.74351800 |
| C  | 20.44947100 | 20.11201300 | 32.81075200 |
| O  | 20.74929500 | 19.01686800 | 32.38267400 |
| N  | 19.22661500 | 20.73656500 | 32.34416000 |
| C  | 18.71664100 | 21.92983300 | 32.71994800 |
| N  | 17.54508400 | 22.34738500 | 32.22490200 |

|    |             |             |             |
|----|-------------|-------------|-------------|
| N  | 19.37239700 | 22.69230700 | 33.61036000 |
| C  | 20.56573900 | 22.19686100 | 34.08186400 |
| H  | 23.32740900 | 22.15353400 | 35.71281700 |
| N* | 13.56099700 | 29.92299600 | 34.24600000 |
| C* | 14.57800900 | 28.98099900 | 33.82997400 |
| C* | 14.09298600 | 27.55498800 | 34.08704200 |
| O* | 14.09600900 | 26.72301800 | 33.16998300 |
| C  | 15.88164500 | 29.23453700 | 34.62250800 |
| C  | 17.05204500 | 28.32991700 | 34.19483300 |
| C  | 17.08402800 | 26.97195400 | 34.91079600 |
| C  | 18.05931300 | 25.99241100 | 34.26009700 |
| N  | 17.98555900 | 24.62826400 | 34.84129700 |
| H  | 15.67771700 | 29.12981300 | 35.69591400 |
| H  | 16.14894700 | 30.28492300 | 34.45304800 |
| H  | 17.99979600 | 28.84754400 | 34.38121200 |
| H  | 16.99432000 | 28.16522100 | 33.11035700 |
| H  | 17.34687700 | 27.11339600 | 35.96740400 |
| H  | 16.09379600 | 26.50463800 | 34.89292600 |
| H  | 19.09363400 | 26.34144500 | 34.35500700 |
| H  | 17.84236100 | 25.91016000 | 33.18880900 |
| H  | 18.25155300 | 24.66703200 | 35.82472300 |
| H  | 18.83832100 | 23.53249300 | 34.10030000 |
| H  | 17.01138200 | 24.32127000 | 34.84605800 |
| H  | 14.82475200 | 29.01785300 | 32.75653700 |
| H  | 13.94317700 | 30.86523400 | 34.25260500 |
| H  | 12.78615900 | 29.92205200 | 33.58841100 |
| H  | 24.42706400 | 24.63833800 | 38.35693500 |
| H  | 23.55447500 | 23.25413200 | 37.67426500 |
| H  | 23.43223700 | 26.17151100 | 36.71271300 |
| H  | 21.83168800 | 25.15622300 | 38.71687700 |
| H  | 21.23770300 | 23.11691700 | 37.48130600 |
| H  | 19.81821200 | 24.12592600 | 37.18446700 |
| H  | 20.59732700 | 24.68048200 | 34.95848800 |
| H  | 17.24971200 | 23.30182700 | 32.36464400 |
| H  | 24.82694600 | 24.06094800 | 36.72407600 |
| H  | 21.15401000 | 26.18790300 | 37.43717500 |
| H  | 18.71865900 | 20.18498700 | 31.66120400 |
| H  | 17.07211300 | 21.81658100 | 31.50814400 |
| H  | 13.73355300 | 27.32151800 | 35.10823100 |

**OxoG**

|   |             |             |             |
|---|-------------|-------------|-------------|
| C | 23.79928700 | 23.83854700 | 37.55214100 |
| C | 23.07932100 | 25.06960900 | 37.01295200 |
| O | 22.77213900 | 24.88818800 | 35.60915200 |
| C | 21.72031400 | 25.33688500 | 37.68102400 |
| C | 20.76406600 | 24.49057600 | 36.83212900 |
| C | 21.38348500 | 24.62608300 | 35.43315700 |
| N | 21.19651200 | 23.46573900 | 34.57292500 |
| C | 21.46252600 | 22.11977500 | 34.91967100 |
| N | 21.29984800 | 21.40926100 | 33.74996200 |
| C | 20.97499600 | 22.26555700 | 32.70111100 |
| C | 20.72246900 | 22.02249500 | 31.32677100 |
| O | 20.72110600 | 20.96179000 | 30.70273400 |
| N | 20.43794500 | 23.25538000 | 30.66664300 |
| C | 20.41352700 | 24.49208300 | 31.25830200 |
| N | 20.07049000 | 25.55439100 | 30.47434100 |
| N | 20.65606500 | 24.68249800 | 32.54209400 |
| C | 20.92561500 | 23.54475400 | 33.21768000 |
| O | 21.75876300 | 21.67489100 | 36.02295900 |
| H | 24.07887300 | 23.99392000 | 38.60107700 |
| H | 23.15544700 | 22.95869200 | 37.46821600 |
| H | 23.73526000 | 25.94534100 | 37.07788900 |
| H | 21.71528000 | 25.05611000 | 38.73791600 |
| H | 20.78454300 | 23.44692900 | 37.14624900 |
| H | 19.73226200 | 24.85061700 | 36.84320200 |
| H | 20.93537400 | 25.45641600 | 34.87811700 |

|   |             |             |             |
|---|-------------|-------------|-------------|
| H | 21.41975300 | 20.41030500 | 33.69296100 |
| H | 20.24646900 | 26.45898300 | 30.88843900 |
| H | 24.71054600 | 23.65449200 | 36.97298200 |
| H | 21.46612500 | 26.39962900 | 37.60121200 |
| H | 20.21706900 | 23.16169500 | 29.68217200 |
| H | 20.22925700 | 25.49588400 | 29.47870400 |

### OxoG (C1')

|    |             |             |             |
|----|-------------|-------------|-------------|
| C  | 23.96818600 | 24.14526900 | 37.37500600 |
| C* | 22.98299000 | 25.18399800 | 36.84898700 |
| O  | 22.58829400 | 24.84136800 | 35.49693100 |
| C* | 21.67600800 | 25.24700300 | 37.63901500 |
| C  | 20.83480500 | 24.16574400 | 36.95585600 |
| C  | 21.24042000 | 24.36973000 | 35.49518800 |
| N  | 21.12506800 | 23.18637500 | 34.65838500 |
| C  | 21.68595700 | 21.92093100 | 34.94089300 |
| N  | 21.35757900 | 21.13374200 | 33.85581700 |
| C  | 20.62123600 | 21.86720300 | 32.92941000 |
| C  | 20.04414400 | 21.50683700 | 31.68538500 |
| O  | 20.05686800 | 20.42677200 | 31.09513200 |
| N  | 19.36943200 | 22.63316900 | 31.12331000 |
| C  | 19.28678100 | 23.87729400 | 31.69118800 |
| N  | 18.53906700 | 24.81665500 | 31.04187000 |
| N  | 19.84464700 | 24.18107300 | 32.84769900 |
| C  | 20.48723400 | 23.14613100 | 33.43470200 |
| O  | 22.31676000 | 21.58933800 | 35.93759200 |
| N* | 13.56099900 | 29.92299700 | 34.24600400 |
| C* | 14.57800400 | 28.98100300 | 33.83000000 |
| C* | 14.09299700 | 27.55500000 | 34.08699300 |
| O* | 14.09600200 | 26.72299900 | 33.17000100 |
| C  | 15.84450200 | 29.25248200 | 34.67960500 |
| C  | 17.08369400 | 28.39433200 | 34.38367800 |
| C  | 16.91460900 | 26.89908000 | 34.70364100 |
| C  | 18.22006200 | 26.18451600 | 35.06240600 |
| N  | 18.05983300 | 24.75068300 | 35.32275800 |
| H  | 15.56741900 | 29.13930400 | 35.73618900 |
| H  | 16.09769800 | 30.31133700 | 34.53289600 |
| H  | 17.90548700 | 28.79594600 | 34.99176700 |
| H  | 17.38501900 | 28.51978100 | 33.33540600 |
| H  | 16.22523000 | 26.78302000 | 35.55406600 |
| H  | 16.45479400 | 26.37643100 | 33.86012000 |
| H  | 18.66318800 | 26.66018300 | 35.94949500 |
| H  | 18.94432200 | 26.28662100 | 34.24617200 |
| H  | 17.23824700 | 24.60373000 | 35.90645600 |
| H  | 17.88300700 | 24.27980900 | 34.43926400 |
| H  | 14.84541300 | 29.02201400 | 32.76179500 |
| H  | 13.94577400 | 30.86411500 | 34.25854900 |
| H  | 12.78792900 | 29.92910900 | 33.58573900 |
| H  | 24.31237700 | 24.42304000 | 38.37862500 |
| H  | 23.49381900 | 23.16065800 | 37.40400000 |
| H  | 23.46969600 | 26.16548500 | 36.79621400 |
| H  | 21.82742200 | 25.06906100 | 38.70794100 |
| H  | 21.13380500 | 23.17014700 | 37.28848500 |
| H  | 19.75641400 | 24.28828400 | 37.05708100 |
| H  | 20.59428700 | 25.10982100 | 35.02132500 |
| H  | 21.61710800 | 20.16295700 | 33.78124200 |
| H  | 18.66039700 | 25.76079500 | 31.38025800 |
| H  | 24.83814100 | 24.08510900 | 36.71237200 |
| H  | 21.20530600 | 26.22954000 | 37.51468500 |
| H  | 18.89467100 | 22.44434400 | 30.24823600 |
| H  | 18.40598800 | 24.72844200 | 30.04467500 |
| H  | 13.73202800 | 27.32306400 | 35.10754700 |

### OxoG (C1') TS

|    |             |             |             |
|----|-------------|-------------|-------------|
| C* | 22.98300000 | 25.18400000 | 36.84900000 |
|----|-------------|-------------|-------------|

|    |             |             |             |
|----|-------------|-------------|-------------|
| O  | 22.56115800 | 25.34265900 | 35.43567800 |
| C* | 21.67600000 | 25.24700000 | 37.63900000 |
| C  | 20.64788500 | 24.70677900 | 36.62414500 |
| C  | 21.29244600 | 25.09683200 | 35.32278400 |
| N  | 21.42072400 | 22.86022100 | 34.48518600 |
| C  | 21.20002200 | 21.67583300 | 35.15329200 |
| N  | 20.73994700 | 20.72817900 | 34.23518200 |
| C  | 20.60808300 | 21.34905600 | 32.99563400 |
| C  | 20.14470300 | 20.89620200 | 31.74580400 |
| O  | 19.72675800 | 19.78574100 | 31.38957600 |
| N  | 20.19493400 | 21.97149700 | 30.79852300 |
| C  | 20.61024000 | 23.24959000 | 31.06697300 |
| N  | 20.50048200 | 24.16098700 | 30.03457600 |
| N  | 21.04433700 | 23.64442000 | 32.24159300 |
| C  | 21.03356800 | 22.66705500 | 33.20380500 |
| O  | 21.35846700 | 21.46389400 | 36.37285500 |
| N* | 13.56100000 | 29.92300000 | 34.24600000 |
| C* | 14.57800000 | 28.98100000 | 33.83000000 |
| C* | 14.09300000 | 27.55500000 | 34.08700000 |
| O* | 14.09600000 | 26.72300000 | 33.17000000 |
| C  | 15.94356800 | 29.17990800 | 34.52248400 |
| C  | 17.00821000 | 28.17046000 | 34.09080600 |
| C  | 18.32869600 | 28.34902800 | 34.84110900 |
| C  | 19.24193700 | 27.14349200 | 34.63208600 |
| N  | 20.50376400 | 27.18676400 | 35.37556200 |
| H  | 15.79212300 | 29.10831200 | 35.61008000 |
| H  | 16.28083700 | 30.20457800 | 34.31773900 |
| H  | 17.17717300 | 28.24629900 | 33.00893300 |
| H  | 16.63831700 | 27.15240500 | 34.26930600 |
| H  | 18.83461300 | 29.26909900 | 34.52081500 |
| H  | 18.12671600 | 28.45120100 | 35.91725800 |
| H  | 19.48364800 | 27.01873100 | 33.57093600 |
| H  | 18.70605200 | 26.23649200 | 34.94298300 |
| H  | 21.17384600 | 27.82220500 | 34.95136100 |
| H  | 20.35537600 | 27.48391300 | 36.33700700 |
| H  | 14.70597900 | 29.05500900 | 32.74534000 |
| H  | 13.80233000 | 30.84900100 | 33.90115000 |
| H  | 13.55580900 | 29.99638200 | 35.26241900 |
| C  | 23.72065600 | 23.86063100 | 36.96883900 |
| H  | 23.64290600 | 26.03345500 | 37.03877100 |
| H  | 21.72755200 | 24.63531100 | 38.54167200 |
| H  | 21.44462600 | 26.27773500 | 37.92407200 |
| H  | 20.60038700 | 23.61600500 | 36.67935400 |
| H  | 19.64309200 | 25.12060000 | 36.72760900 |
| H  | 20.87514600 | 25.08570300 | 34.32959800 |
| H  | 20.44805600 | 19.79450800 | 34.47562200 |
| H  | 21.03212900 | 25.00448700 | 30.20537200 |
| H  | 20.62828200 | 23.79555200 | 29.09963100 |
| H  | 19.82830700 | 21.74156500 | 29.88315800 |
| H  | 24.13585500 | 23.77851400 | 37.97960700 |
| H  | 23.03629100 | 23.02388500 | 36.78938600 |
| H  | 24.54397100 | 23.81862900 | 36.24913000 |
| H  | 13.74836200 | 27.30516200 | 35.11137100 |

**OxoG (C1') P**

|    |             |             |             |
|----|-------------|-------------|-------------|
| C* | 22.98278600 | 25.18392500 | 36.84878400 |
| O  | 22.57961400 | 25.74021600 | 35.53979300 |
| C* | 21.67614500 | 25.24705300 | 37.63925800 |
| C  | 20.64937400 | 24.84195900 | 36.57483500 |
| C  | 21.21758500 | 25.52868300 | 35.33261800 |
| N  | 20.00609100 | 23.45165400 | 33.17901100 |
| C  | 20.04839700 | 22.65757500 | 34.30929000 |
| N  | 18.78757300 | 22.66911600 | 34.92318800 |
| C  | 17.94386000 | 23.47701800 | 34.17043400 |
| C  | 16.61653300 | 23.89660300 | 34.36303800 |
| O  | 15.80811800 | 23.63598000 | 35.27070200 |

|    |             |             |             |
|----|-------------|-------------|-------------|
| N  | 16.22703900 | 24.76914300 | 33.30115400 |
| C  | 17.04827100 | 25.18795300 | 32.28643900 |
| N  | 16.52324600 | 26.12048800 | 31.42117500 |
| N  | 18.29881300 | 24.80866900 | 32.14507600 |
| C  | 18.74232400 | 23.92991500 | 33.10430800 |
| O  | 21.03416200 | 22.06680600 | 34.79405300 |
| N* | 13.56106700 | 29.92297000 | 34.24623300 |
| C* | 14.57779500 | 28.98102100 | 33.82952000 |
| C* | 14.09287500 | 27.55491100 | 34.08730100 |
| O* | 14.09633100 | 26.72312100 | 33.16990400 |
| C  | 15.96900600 | 29.13412700 | 34.52823700 |
| C  | 16.95527900 | 27.99945300 | 34.19189100 |
| C  | 18.35000700 | 28.14897600 | 34.82555100 |
| C  | 19.15809000 | 26.87143900 | 34.58269700 |
| N  | 20.54334200 | 26.92698700 | 35.18878200 |
| H  | 15.80153500 | 29.16948700 | 35.61435200 |
| H  | 16.38347700 | 30.10743600 | 34.23600600 |
| H  | 17.05478800 | 27.90657500 | 33.10509900 |
| H  | 16.53734800 | 27.04485000 | 34.53189900 |
| H  | 18.87104500 | 29.01741700 | 34.40295800 |
| H  | 18.24999000 | 28.31652400 | 35.90704000 |
| H  | 19.28966700 | 26.65668600 | 33.52056300 |
| H  | 18.65891000 | 26.00534800 | 35.02445500 |
| H  | 21.15838600 | 27.50851900 | 34.61287800 |
| H  | 20.51520200 | 27.36649600 | 36.11428600 |
| H  | 14.71167000 | 29.05636000 | 32.74630000 |
| H  | 13.78472000 | 30.84512400 | 33.88073500 |
| H  | 13.56376700 | 30.01112700 | 35.26112900 |
| C  | 23.54094200 | 23.78356000 | 36.64321100 |
| H  | 23.74593700 | 25.86338300 | 37.23739300 |
| H  | 21.67249600 | 24.57654400 | 38.50227200 |
| H  | 21.50351600 | 26.26912300 | 37.99862700 |
| H  | 20.66906600 | 23.76574100 | 36.40942600 |
| H  | 19.62091700 | 25.13770800 | 36.79553300 |
| H  | 21.01764900 | 25.02839100 | 34.38092300 |
| H  | 18.53980700 | 22.12449400 | 35.73320600 |
| H  | 16.97853400 | 26.16574300 | 30.52146100 |
| H  | 15.52392500 | 26.26938800 | 31.43307100 |
| H  | 15.27907200 | 25.13114800 | 33.36018500 |
| H  | 23.83525000 | 23.35619800 | 37.60874900 |
| H  | 22.79799500 | 23.13377200 | 36.16737900 |
| H  | 24.42409000 | 23.82769200 | 35.99829100 |
| H  | 13.75892200 | 27.29038000 | 35.10795900 |

**OxoG (N3)**

|    |             |             |             |
|----|-------------|-------------|-------------|
| C  | 24.05553300 | 24.31705400 | 37.49517700 |
| C* | 22.98292000 | 25.18401200 | 36.84888200 |
| O  | 22.61803100 | 24.62988100 | 35.55449500 |
| C* | 21.67606300 | 25.24699800 | 37.63913100 |
| C  | 20.88936100 | 24.05514100 | 37.08006000 |
| C  | 21.32418300 | 24.06495300 | 35.60828300 |
| N  | 21.31928100 | 22.75462600 | 34.96964500 |
| C  | 22.04759800 | 21.62970700 | 35.44941600 |
| N  | 22.01041500 | 20.71686600 | 34.41823500 |
| C  | 21.32069300 | 21.23880700 | 33.33043600 |
| C  | 21.02511700 | 20.69059900 | 32.05294000 |
| O  | 21.30930300 | 19.59625100 | 31.58391600 |
| N  | 20.30213400 | 21.65172700 | 31.27156800 |
| C  | 19.90445600 | 22.88582300 | 31.68481100 |
| N  | 19.16479500 | 23.64419900 | 30.83308100 |
| N  | 20.16871800 | 23.34862500 | 32.90419400 |
| C  | 20.90635000 | 22.50408100 | 33.67646700 |
| O  | 22.57299900 | 21.50482200 | 36.54460400 |
| N* | 13.56101400 | 29.92302100 | 34.24598800 |
| C* | 14.57800400 | 28.98098400 | 33.83008200 |
| C* | 14.09298600 | 27.55500400 | 34.08690000 |

|    |             |             |             |
|----|-------------|-------------|-------------|
| O* | 14.09601300 | 26.72298100 | 33.17001700 |
| C  | 15.87353300 | 29.23333900 | 34.63998600 |
| C  | 17.10037900 | 28.44216700 | 34.15391300 |
| C  | 17.14051700 | 26.97923600 | 34.62222700 |
| C  | 18.30238500 | 26.22623700 | 33.98756600 |
| N  | 18.16890200 | 24.74447900 | 34.21466500 |
| H  | 15.68146300 | 29.04190200 | 35.70346300 |
| H  | 16.09347400 | 30.30402700 | 34.54931900 |
| H  | 18.00770400 | 28.94664700 | 34.50546600 |
| H  | 17.12902500 | 28.46935600 | 33.05658600 |
| H  | 17.21763700 | 26.93646200 | 35.71528200 |
| H  | 16.21997700 | 26.46411100 | 34.33803100 |
| H  | 19.27367100 | 26.52578400 | 34.38819200 |
| H  | 18.31437700 | 26.36410700 | 32.90400000 |
| H  | 18.19174300 | 24.51666800 | 35.21249900 |
| H  | 18.95439300 | 24.21172100 | 33.70939900 |
| H  | 17.27080800 | 24.41101100 | 33.85334300 |
| H  | 14.83144900 | 29.02140700 | 32.75813500 |
| H  | 13.93802500 | 30.86716200 | 34.24187300 |
| H  | 12.77855800 | 29.91123300 | 33.59768600 |
| H  | 24.38548000 | 24.77269200 | 38.43581300 |
| H  | 23.66751400 | 23.31367900 | 37.68783300 |
| H  | 23.38002100 | 26.18601900 | 36.65317200 |
| H  | 21.83985400 | 25.17782800 | 38.71756400 |
| H  | 21.20496600 | 23.12141000 | 37.54553900 |
| H  | 19.80465400 | 24.15643500 | 37.18362900 |
| H  | 20.65008400 | 24.68141300 | 35.00169800 |
| H  | 22.45240600 | 19.81161500 | 34.46663500 |
| H  | 19.20937900 | 24.64391200 | 30.97153500 |
| H  | 24.91937900 | 24.23067300 | 36.82822100 |
| H  | 21.15017000 | 26.18534600 | 37.42997000 |
| H  | 20.09500300 | 21.34781600 | 30.32653400 |
| H  | 19.09248500 | 23.35525600 | 29.86764100 |
| H  | 13.74060900 | 27.31992400 | 35.11009900 |

**OxoG (N3) TS**

|    |             |             |             |
|----|-------------|-------------|-------------|
| C  | 24.07280500 | 24.35477500 | 37.51329700 |
| C* | 22.98286000 | 25.18403700 | 36.84884400 |
| O  | 22.61618200 | 24.58660900 | 35.56944200 |
| C* | 21.67609800 | 25.24697100 | 37.63918700 |
| C  | 20.92006100 | 24.01717300 | 37.12470400 |
| C  | 21.32209100 | 24.03014300 | 35.64723300 |
| N  | 21.30933700 | 22.71413800 | 35.01015600 |
| C  | 22.13543200 | 21.62378400 | 35.41887300 |
| N  | 22.04664500 | 20.71005400 | 34.38872400 |
| C  | 21.21100000 | 21.18487500 | 33.38611500 |
| C  | 20.80084900 | 20.61191000 | 32.14971700 |
| O  | 21.09155800 | 19.53897400 | 31.64835900 |
| N  | 19.92891700 | 21.52364100 | 31.44830700 |
| C  | 19.48497100 | 22.71933300 | 31.89474100 |
| N  | 18.60044200 | 23.42389200 | 31.17214800 |
| N  | 19.89014800 | 23.20041200 | 33.08182000 |
| C  | 20.77188000 | 22.42154300 | 33.78548900 |
| O  | 22.76138000 | 21.53307000 | 36.45917300 |
| N* | 13.56098200 | 29.92295500 | 34.24605900 |
| C* | 14.57805500 | 28.98104100 | 33.82992000 |
| C* | 14.09301500 | 27.55498800 | 34.08699900 |
| O* | 14.09598900 | 26.72300900 | 33.16999200 |
| C  | 15.87724300 | 29.24036700 | 34.63030500 |
| C  | 17.09629900 | 28.43754100 | 34.14388200 |
| C  | 17.16268800 | 26.99832400 | 34.67320600 |
| C  | 18.28618900 | 26.19731800 | 34.01856100 |
| N  | 18.22058800 | 24.74860400 | 34.35010100 |
| H  | 15.69005600 | 29.05944000 | 35.69663600 |
| H  | 16.09491200 | 30.31070500 | 34.52742000 |
| H  | 18.01054800 | 28.96277800 | 34.44416400 |



|   |             |             |             |
|---|-------------|-------------|-------------|
| H | 17.09334300 | 28.41792900 | 33.04559800 |
| H | 17.29898100 | 27.00623600 | 35.76229600 |
| H | 16.22661100 | 26.47050000 | 34.46994400 |
| H | 19.27334100 | 26.56545700 | 34.31618200 |
| H | 18.21744900 | 26.28705300 | 32.92860300 |
| H | 18.31663300 | 24.62464600 | 35.35940400 |
| H | 19.17029500 | 23.95728300 | 33.65668300 |
| H | 17.28952100 | 24.39524600 | 34.12053200 |
| H | 14.82694200 | 29.02012300 | 32.75676500 |
| H | 13.93781100 | 30.86718300 | 34.23849100 |
| H | 12.77761100 | 29.90989900 | 33.59878500 |
| H | 24.40919100 | 24.85324000 | 38.42948400 |
| H | 23.70187400 | 23.35546600 | 37.75237700 |
| H | 23.36156900 | 26.18589200 | 36.62026100 |
| H | 21.84228000 | 25.22410500 | 38.71922200 |
| H | 21.28776900 | 23.10171700 | 37.59080100 |
| H | 19.83554300 | 24.07480000 | 37.25405100 |
| H | 20.63077400 | 24.64495300 | 35.05950200 |
| H | 22.52953900 | 19.82423300 | 34.39290900 |
| H | 18.46215500 | 24.40153000 | 31.38039800 |
| H | 24.92854100 | 24.25113300 | 36.83864000 |
| H | 21.12521500 | 26.16165800 | 37.39305100 |
| H | 19.62625700 | 21.19035600 | 30.53905900 |
| H | 18.32369600 | 23.10962700 | 30.25354100 |
| H | 13.73993400 | 27.31981700 | 35.10989900 |

**OxoG (N3H)**

|    |             |             |             |
|----|-------------|-------------|-------------|
| C  | 24.07624900 | 24.36251000 | 37.51714900 |
| C* | 22.98283700 | 25.18392100 | 36.84883600 |
| O  | 22.61525200 | 24.58077500 | 35.57238600 |
| C* | 21.67612900 | 25.24712500 | 37.63914800 |
| C  | 20.92953500 | 24.00600600 | 37.13647900 |
| C  | 21.32566600 | 24.01495600 | 35.65784800 |
| N  | 21.32548900 | 22.69557500 | 35.02421600 |
| C  | 22.18219500 | 21.62366200 | 35.42292900 |
| N  | 22.12938900 | 20.72349700 | 34.37809600 |
| C  | 21.28709700 | 21.18773600 | 33.37625400 |
| C  | 20.91677800 | 20.62986400 | 32.12001500 |
| O  | 21.25595500 | 19.58216200 | 31.59802500 |
| N  | 20.02232800 | 21.52593100 | 31.42391400 |
| C  | 19.52249600 | 22.69136700 | 31.88820400 |
| N  | 18.62283800 | 23.37741200 | 31.17373400 |
| N  | 19.90693800 | 23.16099900 | 33.08862200 |
| C  | 20.80878000 | 22.40314000 | 33.79215300 |
| O  | 22.80209800 | 21.53675300 | 36.46644500 |
| N* | 13.56102700 | 29.92307600 | 34.24589400 |
| C* | 14.57805600 | 28.98091600 | 33.83042400 |
| C* | 14.09287300 | 27.55504600 | 34.08662300 |
| O* | 14.09607800 | 26.72291600 | 33.17007600 |
| C  | 15.87722900 | 29.23865900 | 34.63102200 |
| C  | 17.09299700 | 28.42938500 | 34.14682800 |
| C  | 17.16048600 | 26.99460100 | 34.68782800 |
| C  | 18.27585600 | 26.18355500 | 34.03009800 |
| N  | 18.22265500 | 24.74070300 | 34.37641900 |
| H  | 15.68861900 | 29.06083000 | 35.69763600 |
| H  | 16.09786600 | 30.30819500 | 34.52552200 |
| H  | 18.00957900 | 28.95569600 | 34.43816200 |
| H  | 17.08544200 | 28.40039700 | 33.04870200 |
| H  | 17.30747300 | 27.01188200 | 35.77557000 |
| H  | 16.22093900 | 26.46691900 | 34.49968400 |
| H  | 19.26508200 | 26.56097400 | 34.31054600 |
| H  | 18.19449800 | 26.26432400 | 32.93970500 |
| H  | 18.33575400 | 24.62946700 | 35.38463400 |
| H  | 19.22296500 | 23.89062200 | 33.63394400 |

|   |             |             |             |
|---|-------------|-------------|-------------|
| H | 17.28907100 | 24.38282100 | 34.16929800 |
| H | 14.82760700 | 29.02033300 | 32.75743100 |
| H | 13.93884100 | 30.86693500 | 34.24022000 |
| H | 12.77899000 | 29.91167600 | 33.59697300 |
| H | 24.41475700 | 24.87099700 | 38.42701900 |
| H | 23.70891000 | 23.36489000 | 37.76795200 |
| H | 23.35845900 | 26.18562100 | 36.61463200 |
| H | 21.84229400 | 25.23639200 | 38.71935600 |
| H | 21.30906400 | 23.09728500 | 37.60653800 |
| H | 19.84517200 | 24.05312900 | 37.27019700 |
| H | 20.62617700 | 24.62013300 | 35.07019800 |
| H | 22.63839500 | 19.85235000 | 34.37284400 |
| H | 18.39916200 | 24.32915600 | 31.42283700 |
| H | 24.92984800 | 24.25401900 | 36.84057800 |
| H | 21.11862100 | 26.15491800 | 37.38295900 |
| H | 19.75940400 | 21.21006700 | 30.49635600 |
| H | 18.29529300 | 23.03646700 | 30.28216800 |
| H | 13.73950900 | 27.32001200 | 35.10949500 |

**OxoG (N9)**

|    |             |             |             |
|----|-------------|-------------|-------------|
| C  | 23.70573200 | 23.84637300 | 36.97473800 |
| C* | 22.98300700 | 25.18399700 | 36.84900700 |
| O  | 22.62556000 | 25.42299400 | 35.47056800 |
| C* | 21.67599400 | 25.24700300 | 37.63899100 |
| C  | 20.65376200 | 24.72290000 | 36.61320900 |
| C  | 21.24783400 | 25.21398500 | 35.27872000 |
| N  | 21.03368000 | 24.29976900 | 34.13594100 |
| C  | 21.41026000 | 22.90758000 | 34.15087200 |
| N  | 21.66722700 | 22.58640800 | 32.84194400 |
| C  | 21.57035500 | 23.71536900 | 32.02982400 |
| C  | 21.76337300 | 23.88899400 | 30.62834300 |
| O  | 22.07213600 | 23.06308500 | 29.77730800 |
| N  | 21.54261100 | 25.25511900 | 30.28064500 |
| C  | 21.18378700 | 26.25538200 | 31.14472700 |
| N  | 20.95886300 | 27.49045300 | 30.62986000 |
| N  | 21.00041300 | 26.04969200 | 32.44131900 |
| C  | 21.21412100 | 24.77496400 | 32.82430900 |
| O  | 21.44598600 | 22.17141800 | 35.12320300 |
| N* | 13.56100100 | 29.92300700 | 34.24598700 |
| C* | 14.57798900 | 28.98099700 | 33.83002200 |
| C* | 14.09302000 | 27.55499500 | 34.08699300 |
| O* | 14.09598900 | 26.72300100 | 33.16999900 |
| C  | 15.84025400 | 29.23787700 | 34.68772300 |
| C  | 17.11035400 | 28.49335900 | 34.25706700 |
| C  | 16.95108300 | 26.96446800 | 34.21536400 |
| C  | 18.29354000 | 26.27517000 | 34.30250500 |
| N  | 18.14619300 | 24.78819700 | 34.06520800 |
| H  | 15.60194900 | 28.99626000 | 35.73166900 |
| H  | 16.04344200 | 30.31534100 | 34.65538000 |
| H  | 17.90722200 | 28.75944100 | 34.96331300 |
| H  | 17.43443400 | 28.84291600 | 33.26935500 |
| H  | 16.32510800 | 26.62719100 | 35.05138000 |
| H  | 16.44470900 | 26.66993200 | 33.29300400 |
| H  | 18.73040600 | 26.38539100 | 35.29483300 |
| H  | 19.00662600 | 26.62617200 | 33.55425900 |
| H  | 17.51408400 | 24.35756000 | 34.74649400 |
| H  | 19.07582700 | 24.32913800 | 34.12774800 |
| H  | 17.76312200 | 24.60831700 | 33.13270500 |
| H  | 14.84836900 | 29.02467600 | 32.76236800 |
| H  | 13.93701100 | 30.86733400 | 34.24005800 |
| H  | 12.77465000 | 29.91070600 | 33.60206500 |
| H  | 24.05941700 | 23.70795000 | 38.00272700 |
| H  | 23.03640400 | 23.02266500 | 36.70945100 |
| H  | 23.66048900 | 25.99648700 | 37.13273900 |
| H  | 21.70835000 | 24.63945100 | 38.54621600 |
| H  | 20.61597900 | 23.63465200 | 36.62263600 |

|   |             |             |             |
|---|-------------|-------------|-------------|
| H | 19.64749300 | 25.11637800 | 36.78373400 |
| H | 20.80714200 | 26.15795100 | 34.95010400 |
| H | 21.97067000 | 21.66833500 | 32.55289700 |
| H | 20.90305900 | 28.24048500 | 31.30405700 |
| H | 24.57017800 | 23.82250700 | 36.30323900 |
| H | 21.44536800 | 26.28079000 | 37.91618100 |
| H | 21.65813300 | 25.45713900 | 29.29358600 |
| H | 21.34444800 | 27.73412300 | 29.72912500 |
| H | 13.73023200 | 27.32394400 | 35.10732100 |

### FapyG

|   |             |             |             |
|---|-------------|-------------|-------------|
| C | 23.63199500 | 23.61655400 | 36.75532400 |
| C | 22.96857500 | 24.99322300 | 36.80188900 |
| O | 22.34025100 | 25.31430700 | 35.54820300 |
| C | 21.82158700 | 25.08757400 | 37.81818700 |
| C | 20.64409700 | 24.49812200 | 37.02667400 |
| C | 20.98499100 | 24.83492300 | 35.55574200 |
| H | 24.16791400 | 23.42283000 | 37.69215100 |
| H | 22.89519000 | 22.82186000 | 36.60304200 |
| H | 23.72957600 | 25.76313900 | 36.97098500 |
| H | 22.02747400 | 24.54343500 | 38.74465700 |
| H | 20.59564200 | 23.41246600 | 37.15991900 |
| H | 19.67653000 | 24.91327800 | 37.31832800 |
| H | 20.37148100 | 25.63779900 | 35.14559600 |
| H | 24.34715000 | 23.57452200 | 35.92734700 |
| H | 21.63235500 | 26.13805500 | 38.06263400 |
| N | 20.81943500 | 24.94461900 | 32.79780200 |
| C | 20.83444800 | 23.70076800 | 33.36964500 |
| C | 20.85344300 | 22.53303700 | 32.59126600 |
| C | 20.77583600 | 22.63164000 | 31.16524600 |
| N | 20.75716700 | 23.94766900 | 30.67368500 |
| C | 20.77753800 | 25.03854800 | 31.49276400 |
| N | 20.80487800 | 21.18339000 | 33.03631100 |
| C | 21.24095200 | 20.57334700 | 34.15638800 |
| N | 20.80146600 | 23.66272600 | 34.72921300 |
| O | 21.72326100 | 21.10358500 | 35.16420700 |
| O | 20.70380400 | 21.67695200 | 30.37683800 |
| N | 20.70292600 | 26.26746100 | 30.90451700 |
| H | 20.91328100 | 27.03971800 | 31.52127500 |
| H | 21.03033100 | 26.36959800 | 29.95454700 |
| H | 20.67588900 | 24.04092400 | 29.66860200 |
| H | 20.53040200 | 20.56217500 | 32.27986700 |
| H | 21.10197400 | 19.48166500 | 34.09440600 |
| H | 21.11312800 | 22.77418400 | 35.13146100 |

### FapyG (C1')

|    |             |             |             |
|----|-------------|-------------|-------------|
| C* | 22.98302500 | 25.18399400 | 36.84903100 |
| O  | 22.61674800 | 24.50024200 | 35.63949500 |
| C* | 21.67597600 | 25.24700900 | 37.63895900 |
| C  | 21.07546900 | 23.86252400 | 37.35303900 |
| C  | 21.57415400 | 23.54603700 | 35.92789400 |
| N  | 22.05068100 | 22.18203000 | 35.86267700 |
| C  | 23.81259600 | 19.80708700 | 37.00991600 |
| N  | 23.41122300 | 19.51251900 | 35.75710900 |
| C  | 23.02189300 | 20.32468500 | 34.65643900 |
| C  | 23.23038300 | 19.66938400 | 33.40161500 |
| O  | 23.71869500 | 18.53946700 | 33.24651800 |
| N  | 22.80102900 | 20.40511600 | 32.28401100 |
| C  | 22.20464900 | 21.62763900 | 32.39438000 |
| N  | 21.77896400 | 22.22473800 | 31.24315100 |
| N  | 21.99141500 | 22.21218000 | 33.54552600 |
| C  | 22.36776700 | 21.56681600 | 34.69274600 |
| N* | 13.56100400 | 29.92300800 | 34.24599000 |
| C* | 14.57799800 | 28.98098800 | 33.83001600 |

|    |             |             |             |
|----|-------------|-------------|-------------|
| C* | 14.09299400 | 27.55500200 | 34.08700300 |
| O* | 14.09600400 | 26.72299900 | 33.17000100 |
| C  | 15.95564900 | 29.23023800 | 34.49624600 |
| C  | 17.08719700 | 28.26931200 | 34.08935900 |
| C  | 17.15540600 | 26.98912200 | 34.93197800 |
| C  | 18.37259700 | 26.12116200 | 34.58986200 |
| N  | 18.49710800 | 24.89099000 | 35.38171900 |
| H  | 15.82412800 | 29.20823500 | 35.58809700 |
| H  | 16.22729100 | 30.26148500 | 34.23714400 |
| H  | 18.04693600 | 28.79263800 | 34.18575000 |
| H  | 16.98143600 | 28.00523400 | 33.02819700 |
| H  | 17.20196500 | 27.26086700 | 35.99687200 |
| H  | 16.24859300 | 26.38678600 | 34.79670600 |
| H  | 19.28926000 | 26.70900600 | 34.72927500 |
| H  | 18.33530400 | 25.84191200 | 33.52935000 |
| H  | 18.50734100 | 25.13999900 | 36.36919200 |
| H  | 17.65766900 | 24.32867300 | 35.25083500 |
| H  | 14.69774300 | 29.05029500 | 32.74383900 |
| H  | 13.81579500 | 30.85125100 | 33.91640000 |
| H  | 13.54683700 | 29.98435500 | 35.26337400 |
| C  | 24.10873600 | 24.45256400 | 37.58237000 |
| H  | 23.32967300 | 26.18001000 | 36.54974400 |
| H  | 21.82544600 | 25.43981000 | 38.70581200 |
| H  | 21.03415100 | 26.03198200 | 37.22337800 |
| H  | 21.46120900 | 23.12396700 | 38.06394200 |
| H  | 19.98541200 | 23.84069100 | 37.39413700 |
| H  | 20.79216100 | 23.69060700 | 35.18395100 |
| H  | 21.51795900 | 23.19518200 | 31.34888800 |
| H  | 22.24438100 | 21.99245600 | 30.37741200 |
| H  | 22.91097800 | 19.94847200 | 31.38695200 |
| O  | 23.83166200 | 20.91804300 | 37.55264000 |
| H  | 13.74490900 | 27.30428400 | 35.10961700 |
| H  | 24.42615000 | 25.02648400 | 38.46138800 |
| H  | 23.79248600 | 23.45713000 | 37.90888600 |
| H  | 24.96813600 | 24.32906200 | 36.91553400 |
| H  | 23.56638400 | 18.55163000 | 35.46437200 |
| H  | 22.60100900 | 21.86226800 | 36.66390300 |
| H  | 24.12678700 | 18.89887400 | 37.55020600 |

**FapyG (C1') TS**

|    |             |             |             |
|----|-------------|-------------|-------------|
| C* | 22.98300000 | 25.18400000 | 36.84900000 |
| O  | 22.55680400 | 25.33487700 | 35.42953700 |
| C* | 21.67600000 | 25.24700000 | 37.63900000 |
| C  | 20.61829200 | 24.80414800 | 36.61206200 |
| C  | 21.27132700 | 25.18976700 | 35.32405700 |
| N  | 20.95987600 | 22.96932500 | 34.21442600 |
| C  | 20.54332400 | 20.70529600 | 36.57747000 |
| N  | 19.57863500 | 20.70360500 | 35.63706100 |
| C  | 18.93699100 | 21.83127300 | 35.04895900 |
| C  | 17.52480600 | 21.74969100 | 35.03343800 |
| O  | 16.81454600 | 20.83611000 | 35.49596000 |
| N  | 16.89522400 | 22.84874700 | 34.39728200 |
| C  | 17.60803600 | 23.87936100 | 33.85161200 |
| N  | 16.87897000 | 24.95318500 | 33.39255000 |
| N  | 18.90931500 | 23.91714300 | 33.79953200 |
| C  | 19.65297800 | 22.85964800 | 34.35385500 |
| O  | 21.13830400 | 21.69440000 | 37.01804300 |
| N* | 13.56100000 | 29.92300000 | 34.24600000 |
| C* | 14.57800000 | 28.98100000 | 33.83000000 |
| C* | 14.09300000 | 27.55500000 | 34.08700000 |
| O* | 14.09600000 | 26.72300000 | 33.17000000 |
| C  | 15.93071200 | 29.20892200 | 34.54141900 |

|   |             |             |             |
|---|-------------|-------------|-------------|
| C | 17.03653200 | 28.24165500 | 34.12970500 |
| C | 18.33410500 | 28.45534700 | 34.91182600 |
| C | 19.31757500 | 27.31705600 | 34.64988200 |
| N | 20.54978500 | 27.36027900 | 35.44645500 |
| H | 15.76106300 | 29.12793200 | 35.62581800 |
| H | 16.23214800 | 30.24720200 | 34.34844000 |
| H | 17.22996500 | 28.33522200 | 33.05189500 |
| H | 16.70182700 | 27.21185800 | 34.29412100 |
| H | 18.78782000 | 29.42258200 | 34.65727600 |
| H | 18.10629800 | 28.48170600 | 35.98760700 |
| H | 19.60795600 | 27.29444100 | 33.59355900 |
| H | 18.82481400 | 26.35785200 | 34.84734100 |
| H | 21.20475700 | 28.05175600 | 35.09222600 |
| H | 20.34717000 | 27.59237600 | 36.41587500 |
| H | 14.71305100 | 29.05622100 | 32.74635800 |
| H | 13.79864300 | 30.84658900 | 33.89280700 |
| H | 13.56318300 | 30.00317400 | 35.26177900 |
| C | 23.73066000 | 23.86720700 | 36.96366500 |
| H | 23.64013100 | 26.03713400 | 37.03108300 |
| H | 21.70712900 | 24.58354700 | 38.50570700 |
| H | 21.48569600 | 26.26787100 | 37.98402700 |
| H | 20.50177600 | 23.71501700 | 36.62896400 |
| H | 19.63866300 | 25.26803200 | 36.73537400 |
| H | 20.82886400 | 25.22015000 | 34.34478300 |
| H | 19.09041100 | 19.82380900 | 35.51009300 |
| H | 17.38452300 | 25.55807400 | 32.76223800 |
| H | 15.89757800 | 24.84195700 | 33.17571700 |
| H | 15.88389000 | 22.83914800 | 34.39199400 |
| H | 24.14984400 | 23.78103300 | 37.97210100 |
| H | 23.04677100 | 23.03045500 | 36.79454700 |
| H | 24.55063300 | 23.82814500 | 36.23993200 |
| H | 13.74855300 | 27.30379200 | 35.11038800 |
| H | 21.42154000 | 22.22483400 | 34.73284100 |
| H | 20.79097900 | 19.68147500 | 36.91281900 |

### FapyG (C1') P

|    |             |             |             |
|----|-------------|-------------|-------------|
| C* | 22.98294400 | 25.18408300 | 36.84887600 |
| O  | 22.55913700 | 25.65499800 | 35.50699100 |
| C* | 21.67604400 | 25.24690800 | 37.63915600 |
| C  | 20.63693500 | 24.82109200 | 36.59299900 |
| C  | 21.18566300 | 25.48263500 | 35.33879900 |
| N  | 20.62497500 | 22.82145300 | 33.94704400 |
| C  | 20.49975600 | 20.57698300 | 36.38432400 |
| N  | 19.43446100 | 20.58474300 | 35.55952400 |
| C  | 18.72408400 | 21.72350200 | 35.07874800 |
| C  | 17.32861500 | 21.64860000 | 35.24607600 |
| O  | 16.66858100 | 20.73949200 | 35.79311200 |
| N  | 16.62526500 | 22.75132500 | 34.68829100 |
| C  | 17.26996600 | 23.76791000 | 34.04318500 |
| N  | 16.48326700 | 24.83787500 | 33.65165700 |
| N  | 18.55389000 | 23.81577700 | 33.84128300 |
| C  | 19.36304900 | 22.74619300 | 34.28652500 |
| O  | 21.12728900 | 21.56089000 | 36.78589400 |
| N* | 13.56099700 | 29.92298900 | 34.24601800 |
| C* | 14.57800200 | 28.98102200 | 33.82993100 |
| C* | 14.09304300 | 27.55499500 | 34.08702800 |
| O* | 14.09597000 | 26.72300500 | 33.16999100 |
| C  | 15.97045100 | 29.15916800 | 34.52178700 |
| C  | 16.98720800 | 28.06179600 | 34.15730100 |
| C  | 18.36963000 | 28.18853800 | 34.83040700 |
| C  | 19.15894800 | 26.89416200 | 34.60422900 |
| N  | 20.54512300 | 26.91112500 | 35.20742300 |
| H  | 15.81049000 | 29.16053600 | 35.60987200 |
| H  | 16.35159400 | 30.15319400 | 34.25417200 |
| H  | 17.11880700 | 28.03574600 | 33.06704400 |

|   |             |             |             |
|---|-------------|-------------|-------------|
| H | 16.57478900 | 27.08738300 | 34.43505100 |
| H | 18.91692500 | 29.05239200 | 34.43227200 |
| H | 18.23934100 | 28.34919600 | 35.90939600 |
| H | 19.29722900 | 26.67263200 | 33.54500600 |
| H | 18.64438300 | 26.03499600 | 35.03470800 |
| H | 21.17668900 | 27.48148700 | 34.63890700 |
| H | 20.52821100 | 27.34054900 | 36.13793900 |
| H | 14.70702600 | 29.05518100 | 32.74573800 |
| H | 13.79363700 | 30.84850700 | 33.89444900 |
| H | 13.55485000 | 30.00011500 | 35.26194700 |
| C | 23.59387700 | 23.79949700 | 36.72400500 |
| H | 23.72221000 | 25.91163600 | 37.19607700 |
| H | 21.68373300 | 24.58712200 | 38.51061400 |
| H | 21.49799400 | 26.27206700 | 37.98921100 |
| H | 20.64515400 | 23.73911600 | 36.44170700 |
| H | 19.61439800 | 25.13032600 | 36.82574100 |
| H | 20.94386100 | 24.95126800 | 34.41315400 |
| H | 18.94650700 | 19.70101500 | 35.46416300 |
| H | 16.89441200 | 25.38154200 | 32.90614500 |
| H | 15.48911100 | 24.69448400 | 33.52828200 |
| H | 15.61948500 | 22.73427000 | 34.78852500 |
| H | 23.99203700 | 23.48701600 | 37.69646900 |
| H | 22.84609100 | 23.06960700 | 36.40328200 |
| H | 24.41631100 | 23.82076800 | 36.00179400 |
| H | 13.75332300 | 27.30179100 | 35.11123100 |
| H | 21.12559500 | 22.03735800 | 34.36309800 |
| H | 20.79817700 | 19.54618900 | 36.65599000 |

**FapyG (N3)**

|    |             |             |             |
|----|-------------|-------------|-------------|
| C  | 23.59954300 | 23.78547500 | 36.82036400 |
| C* | 22.98302500 | 25.18399200 | 36.84902800 |
| O  | 22.61330500 | 25.62308900 | 35.52593000 |
| C* | 21.67598400 | 25.24700600 | 37.63896800 |
| C  | 20.62508300 | 24.82874500 | 36.58984300 |
| C  | 21.29260700 | 25.18077100 | 35.23711000 |
| N  | 21.25898600 | 24.01411400 | 34.35550700 |
| C  | 22.79923700 | 21.19408400 | 34.38401700 |
| N  | 23.30502600 | 21.96008200 | 33.39133100 |
| C  | 22.80148800 | 23.08832800 | 32.69792100 |
| C  | 23.43595700 | 23.24898300 | 31.40925100 |
| O  | 24.28560600 | 22.49355200 | 30.93640600 |
| N  | 23.06106000 | 24.41074100 | 30.71232300 |
| C  | 22.15926600 | 25.30766700 | 31.18827500 |
| N  | 21.82858400 | 26.36317500 | 30.40648100 |
| N  | 21.57127500 | 25.13835800 | 32.35689000 |
| C  | 21.91612600 | 24.05682000 | 33.14384500 |
| O  | 21.76659100 | 21.39403300 | 35.02916300 |
| N* | 13.56100200 | 29.92300400 | 34.24599700 |
| C* | 14.57799300 | 28.98099600 | 33.83000200 |
| C* | 14.09298800 | 27.55500500 | 34.08700300 |
| O* | 14.09600700 | 26.72299800 | 33.17000200 |
| C  | 15.86218700 | 29.24785000 | 34.65810600 |
| C  | 17.16368800 | 28.81423600 | 33.97728200 |
| C  | 17.32651400 | 27.30031700 | 33.79073300 |
| C  | 18.67666600 | 27.01687000 | 33.15109500 |
| N  | 18.93777400 | 25.55310000 | 32.95928600 |
| H  | 15.77030800 | 28.78429200 | 35.64937300 |
| H  | 15.92143300 | 30.32908800 | 34.83186300 |
| H  | 18.00633900 | 29.18737600 | 34.57293300 |
| H  | 17.22844600 | 29.30303500 | 32.99611500 |
| H  | 17.26392200 | 26.79582200 | 34.76451800 |
| H  | 16.52659900 | 26.90320900 | 33.15881700 |
| H  | 19.49640100 | 27.40036800 | 33.76352600 |
| H  | 18.74562500 | 27.47349200 | 32.16069600 |
| H  | 18.86051000 | 25.02888100 | 33.83557900 |
| H  | 19.94993200 | 25.41530100 | 32.61882500 |

|   |             |             |             |
|---|-------------|-------------|-------------|
| H | 18.28122800 | 25.14076600 | 32.29273500 |
| H | 14.83141200 | 29.02369000 | 32.75736800 |
| H | 13.92049800 | 30.87143900 | 34.18327200 |
| H | 12.75134700 | 29.87119500 | 33.63309000 |
| H | 24.01534800 | 23.54086400 | 37.80422400 |
| H | 22.85302800 | 23.02600800 | 36.56764500 |
| H | 23.72096800 | 25.90708500 | 37.20980000 |
| H | 21.67957500 | 24.59002400 | 38.51268200 |
| H | 20.42332200 | 23.75475800 | 36.64169600 |
| H | 19.67385900 | 25.35198500 | 36.71830400 |
| H | 20.81509300 | 26.01656000 | 34.72009000 |
| H | 24.12344000 | 21.57924700 | 32.92342500 |
| H | 21.40427900 | 27.15718500 | 30.86367800 |
| H | 24.40310700 | 23.74188700 | 36.07833700 |
| H | 21.49096000 | 26.27217000 | 37.97417600 |
| H | 23.53273700 | 24.56102800 | 29.82791800 |
| H | 22.38787800 | 26.57057800 | 29.59170200 |
| H | 13.73105300 | 27.32255500 | 35.10710100 |
| H | 21.37464700 | 23.11164800 | 34.82650200 |
| H | 23.44521400 | 20.32561100 | 34.58462000 |

### FapyG (N3) TS

|    |             |             |             |
|----|-------------|-------------|-------------|
| C  | 23.68395800 | 23.82932200 | 36.93414600 |
| C* | 22.98284400 | 25.18403600 | 36.84880900 |
| O  | 22.57418800 | 25.47885700 | 35.49402100 |
| C* | 21.67609300 | 25.24697500 | 37.63922900 |
| C  | 20.66293500 | 24.63483800 | 36.65563000 |
| C  | 21.27002900 | 24.95396800 | 35.27027400 |
| N  | 21.29506600 | 23.74621300 | 34.44593600 |
| C  | 23.15744500 | 21.13894900 | 34.42136100 |
| N  | 23.47163800 | 21.90766100 | 33.35136000 |
| C  | 22.75486100 | 22.91621900 | 32.66530600 |
| C  | 23.22246500 | 23.08785600 | 31.30770000 |
| O  | 24.10724700 | 22.42735800 | 30.77128900 |
| N  | 22.63658100 | 24.16706500 | 30.60681700 |
| C  | 21.68346400 | 24.96801900 | 31.12758500 |
| N  | 21.13269200 | 25.93567600 | 30.37748100 |
| N  | 21.25698900 | 24.77246500 | 32.37107200 |
| C  | 21.80958300 | 23.78458800 | 33.18009800 |
| O  | 22.16178500 | 21.23818500 | 35.14074300 |
| N* | 13.56095400 | 29.92290800 | 34.24609500 |
| C* | 14.57809300 | 28.98108400 | 33.82985700 |
| C* | 14.09307300 | 27.55497800 | 34.08702600 |
| O* | 14.09594400 | 26.72301800 | 33.16998400 |
| C  | 15.86664900 | 29.24679400 | 34.65044700 |
| C  | 17.16403700 | 28.78842200 | 33.97521800 |
| C  | 17.27756800 | 27.27598000 | 33.75456600 |
| C  | 18.66065500 | 26.90748300 | 33.22931200 |
| N  | 18.84275700 | 25.44836400 | 33.00912100 |
| H  | 15.77152400 | 28.79375000 | 35.64640100 |
| H  | 15.93500500 | 30.32958400 | 34.81283600 |
| H  | 18.00786000 | 29.12137700 | 34.59336500 |
| H  | 17.26137200 | 29.29845800 | 33.00750800 |
| H  | 17.09982900 | 26.74625100 | 34.70118700 |
| H  | 16.51594700 | 26.93595000 | 33.04628700 |
| H  | 19.43608100 | 27.23407100 | 33.92993200 |
| H  | 18.84823000 | 27.40892000 | 32.27287700 |
| H  | 18.62209900 | 24.93372900 | 33.86342400 |
| H  | 20.11423200 | 25.13650600 | 32.67159300 |
| H  | 18.18637500 | 25.11566600 | 32.30115500 |
| H  | 14.82772900 | 29.02311800 | 32.75626600 |
| H  | 13.92241000 | 30.87095600 | 34.18888500 |
| H  | 12.75403000 | 29.87492700 | 33.62935900 |
| H  | 24.09428900 | 23.68369400 | 37.93968600 |
| H  | 22.99448600 | 23.00574700 | 36.72284900 |
| H  | 23.67784900 | 25.98010400 | 37.13283900 |

|   |             |             |             |
|---|-------------|-------------|-------------|
| H | 21.72627900 | 24.70092400 | 38.58511100 |
| H | 20.58996200 | 23.55173500 | 36.79161400 |
| H | 19.65882200 | 25.05241800 | 36.76418800 |
| H | 20.72164400 | 25.72835500 | 34.73091300 |
| H | 24.29372800 | 21.61346200 | 32.83152200 |
| H | 20.60814100 | 26.66894200 | 30.83030200 |
| H | 24.50499500 | 23.78438700 | 36.21130800 |
| H | 21.42024600 | 26.28997300 | 37.85041200 |
| H | 23.00918200 | 24.33406600 | 29.67844500 |
| H | 21.45749500 | 26.11235300 | 29.43873200 |
| H | 13.73193700 | 27.32223900 | 35.10740400 |
| H | 21.54181000 | 22.88170200 | 34.93854000 |
| H | 23.93077900 | 20.37798300 | 34.60510900 |

**FapyG (N3H)**

|    |             |             |             |
|----|-------------|-------------|-------------|
| C  | 23.73769400 | 23.86602900 | 37.01248500 |
| C* | 22.98291700 | 25.18402500 | 36.84891400 |
| O  | 22.55699800 | 25.37782500 | 35.47989000 |
| C* | 21.67605200 | 25.24698200 | 37.63910000 |
| C  | 20.69417600 | 24.51743400 | 36.70554600 |
| C  | 21.27540500 | 24.78690300 | 35.29951100 |
| N  | 21.35390700 | 23.53648200 | 34.54232300 |
| C  | 23.30703800 | 21.00030500 | 34.57519300 |
| N  | 23.54464000 | 21.71247300 | 33.44686000 |
| C  | 22.76120000 | 22.65561800 | 32.74217600 |
| C  | 23.15264800 | 22.76301600 | 31.35370100 |
| O  | 24.02973000 | 22.10177700 | 30.80931900 |
| N  | 22.49473000 | 23.78098500 | 30.61795100 |
| C  | 21.54356300 | 24.58180500 | 31.13220100 |
| N  | 20.92646300 | 25.49321100 | 30.37533200 |
| N  | 21.19854000 | 24.43813900 | 32.41264200 |
| C  | 21.81120000 | 23.51561300 | 33.26101100 |
| O  | 22.34372400 | 21.11274900 | 35.33485900 |
| N* | 13.56099600 | 29.92297900 | 34.24603800 |
| C* | 14.57803600 | 28.98100400 | 33.82989700 |
| C* | 14.09297900 | 27.55495800 | 34.08709800 |
| O* | 14.09602000 | 26.72305200 | 33.16995300 |
| C  | 15.86275400 | 29.24522500 | 34.65727000 |
| C  | 17.16292100 | 28.75517900 | 34.00962300 |
| C  | 17.25167900 | 27.23928100 | 33.80510400 |
| C  | 18.64092900 | 26.82102200 | 33.33160200 |
| N  | 18.77681000 | 25.36636700 | 33.08609500 |
| H  | 15.74795700 | 28.81194900 | 35.65999400 |
| H  | 15.94262600 | 30.33020000 | 34.80014200 |
| H  | 18.00128000 | 29.07940900 | 34.64007300 |
| H  | 17.28878600 | 29.25359700 | 33.03901300 |
| H  | 17.02251700 | 26.72015800 | 34.74682800 |
| H  | 16.50911200 | 26.91174600 | 33.07116000 |
| H  | 19.39671800 | 27.11020700 | 34.07065600 |
| H  | 18.88800200 | 27.34289800 | 32.39856500 |
| H  | 18.50949600 | 24.85310100 | 33.92637700 |
| H  | 20.22712400 | 24.86730700 | 32.72232900 |
| H  | 18.11184900 | 25.07771600 | 32.36851600 |
| H  | 14.83140400 | 29.02363800 | 32.75734900 |
| H  | 13.92453900 | 30.87055700 | 34.19431800 |
| H  | 12.75639200 | 29.87931800 | 33.62593800 |
| H  | 24.14847800 | 23.79365700 | 38.02569100 |
| H  | 23.08384700 | 23.00410800 | 36.84506400 |
| H  | 23.64692700 | 26.02302900 | 37.07791100 |
| H  | 21.75137300 | 24.77446300 | 38.62214000 |
| H  | 20.68862900 | 23.44224800 | 36.90846300 |
| H  | 19.66725200 | 24.87937200 | 36.79592900 |
| H  | 20.68418400 | 25.50228100 | 34.72655300 |
| H  | 24.35245400 | 21.41514200 | 32.90681000 |
| H  | 20.31094500 | 26.16919500 | 30.80209200 |
| H  | 24.56376100 | 23.81404300 | 36.29584100 |



|   |             |             |             |
|---|-------------|-------------|-------------|
| H | 21.37338400 | 26.29013600 | 37.77313600 |
| H | 22.80116400 | 23.88899500 | 29.65699000 |
| H | 21.16130800 | 25.61457500 | 29.40204700 |
| H | 13.73274300 | 27.32217200 | 35.10779300 |
| H | 21.65027200 | 22.71038700 | 35.07356400 |
| H | 24.11230100 | 20.27530700 | 34.76518800 |

**FapyG (N9)**

|    |             |             |             |
|----|-------------|-------------|-------------|
| C  | 23.46584600 | 23.75420800 | 36.60609800 |
| C* | 22.98299200 | 25.18400500 | 36.84899000 |
| O  | 22.69603800 | 25.85520800 | 35.61007000 |
| C* | 21.67600500 | 25.24699500 | 37.63901300 |
| C  | 20.61805900 | 25.11332700 | 36.52418300 |
| C  | 21.34543300 | 25.63732300 | 35.26043200 |
| N* | 13.56099900 | 29.92299700 | 34.24600400 |
| C* | 14.57800300 | 28.98100300 | 33.82998800 |
| C* | 14.09300100 | 27.55499700 | 34.08700900 |
| O* | 14.09600000 | 26.72300400 | 33.16999600 |
| C  | 15.83905100 | 29.24225500 | 34.68509100 |
| C  | 17.12966200 | 28.62349300 | 34.14523500 |
| C  | 17.06835700 | 27.10002000 | 33.95012800 |
| C  | 18.47254900 | 26.53766500 | 33.95813700 |
| N  | 18.51637100 | 25.06781800 | 33.65705300 |
| H  | 15.65112100 | 28.89228300 | 35.70886300 |
| H  | 15.97792400 | 30.32848700 | 34.75025600 |
| H  | 17.93675300 | 28.86742000 | 34.84844000 |
| H  | 17.39388600 | 29.09208600 | 33.18941800 |
| H  | 16.49768900 | 26.63485700 | 34.76417000 |
| H  | 16.55191300 | 26.85474700 | 33.01786700 |
| H  | 18.91064200 | 26.65907100 | 34.94822400 |
| H  | 19.13501000 | 27.00471000 | 33.22778000 |
| H  | 17.89961800 | 24.54024900 | 34.27907200 |
| H  | 19.53364200 | 24.74022900 | 33.79818000 |
| H  | 18.22306000 | 24.88087400 | 32.69565600 |
| H  | 14.84509100 | 29.02607600 | 32.76125500 |
| H  | 13.92749100 | 30.87005100 | 34.20490600 |
| H  | 12.75968800 | 29.88744000 | 33.62115200 |
| H  | 23.82949600 | 23.31875500 | 37.54330500 |
| H  | 22.66054400 | 23.11844300 | 36.22524400 |
| H  | 23.78007100 | 25.76288900 | 37.32573000 |
| H  | 21.59938200 | 24.45574700 | 38.38872400 |
| H  | 20.32829400 | 24.06692500 | 36.38155200 |
| H  | 19.71053300 | 25.68342400 | 36.74077000 |
| H  | 20.96949800 | 26.58893300 | 34.88511800 |
| H  | 24.28140600 | 23.75107800 | 35.87597400 |
| H  | 21.58192000 | 26.21585300 | 38.13829300 |
| H  | 13.73319800 | 27.32359400 | 35.10812900 |
| N  | 21.35458700 | 26.13184000 | 32.38106900 |
| C  | 21.83025200 | 24.98295700 | 32.94712400 |
| C  | 22.80920100 | 24.20109700 | 32.36514100 |
| C  | 23.40746700 | 24.64460800 | 31.12078800 |
| N  | 22.87806000 | 25.84093100 | 30.62268000 |
| C  | 21.88984900 | 26.54219600 | 31.25166000 |
| N  | 23.41797000 | 23.02288700 | 32.85843100 |
| C  | 22.92470600 | 22.01278800 | 33.61060400 |
| N  | 21.19152000 | 24.65915600 | 34.16072000 |
| O  | 21.82690700 | 21.98293500 | 34.17310700 |
| O  | 24.32807400 | 24.07327200 | 30.53600000 |
| N  | 21.42708900 | 27.66518700 | 30.64986400 |
| H  | 20.84447200 | 28.26394300 | 31.21641300 |
| H  | 21.97830700 | 28.12178800 | 29.93796900 |
| H  | 23.28348000 | 26.16572400 | 29.75206700 |
| H  | 24.29533100 | 22.82776400 | 32.38326500 |
| H  | 23.64176800 | 21.18210400 | 33.69160700 |
| H  | 21.40065400 | 23.69395500 | 34.44028200 |

**FapyG (N9) TS**

|    |             |             |             |
|----|-------------|-------------|-------------|
| C  | 23.63206300 | 23.80324900 | 36.88347500 |
| C* | 22.98300000 | 25.18400000 | 36.84900000 |
| O  | 22.64727000 | 25.53548800 | 35.48764200 |
| C* | 21.67600000 | 25.24700000 | 37.63900000 |
| C  | 20.63502800 | 24.87262900 | 36.56910600 |
| C  | 21.26939400 | 25.41418000 | 35.27690400 |
| N* | 13.56100000 | 29.92300000 | 34.24600000 |
| C* | 14.57800000 | 28.98100000 | 33.83000000 |
| C* | 14.09300000 | 27.55500000 | 34.08700000 |
| O* | 14.09600000 | 26.72300000 | 33.17000000 |
| C  | 15.83763000 | 29.24130600 | 34.68650800 |
| C  | 17.11620000 | 28.55600800 | 34.19945700 |
| C  | 17.02218100 | 27.02570800 | 34.09592400 |
| C  | 18.40664100 | 26.41047600 | 34.15055800 |
| N  | 18.44363500 | 24.94657200 | 33.89902200 |
| H  | 15.62211500 | 28.94447200 | 35.72151800 |
| H  | 16.00583200 | 30.32563100 | 34.70324600 |
| H  | 17.92191600 | 28.82177900 | 34.89679600 |
| H  | 17.40401000 | 28.96182300 | 33.22125600 |
| H  | 16.42338400 | 26.62389600 | 34.92432800 |
| H  | 16.51635500 | 26.73587100 | 33.17106900 |
| H  | 18.82941800 | 26.58052400 | 35.14357200 |
| H  | 19.08064200 | 26.86038000 | 33.41686900 |
| H  | 17.85297500 | 24.44959500 | 34.56656500 |
| H  | 19.74934400 | 24.58038300 | 33.98149800 |
| H  | 18.07497400 | 24.74574600 | 32.96905500 |
| H  | 14.84700200 | 29.02537700 | 32.76191800 |
| H  | 13.93237800 | 30.86876300 | 34.21831100 |
| H  | 12.76600100 | 29.89761600 | 33.61275000 |
| H  | 24.02210200 | 23.59850200 | 37.88640500 |
| H  | 22.90593900 | 23.02623500 | 36.62413600 |
| H  | 23.70010100 | 25.93760200 | 37.18920800 |
| H  | 21.67119000 | 24.56096800 | 38.48883000 |
| H  | 20.53194100 | 23.78458500 | 36.49640000 |
| H  | 19.64545700 | 25.29592100 | 36.75558500 |
| H  | 20.87801300 | 26.38260100 | 34.95927500 |
| H  | 24.46019200 | 23.75765300 | 36.16899700 |
| H  | 21.49473300 | 26.26202800 | 38.00552700 |
| H  | 13.73372800 | 27.32345600 | 35.10832900 |
| N  | 21.05906000 | 25.81757200 | 32.24734600 |
| C  | 21.66454200 | 24.80959300 | 32.92483600 |
| C  | 22.81529000 | 24.17553500 | 32.51683400 |
| C  | 23.46627800 | 24.65597500 | 31.30595000 |
| N  | 22.79128300 | 25.70008300 | 30.66898400 |
| C  | 21.62505100 | 26.24149400 | 31.13395100 |
| N  | 23.54055300 | 23.13368000 | 33.12928800 |
| C  | 23.15188900 | 22.15019600 | 33.96917400 |
| N  | 20.98141500 | 24.47015200 | 34.14348700 |
| O  | 22.03338000 | 22.01753200 | 34.47818900 |
| O  | 24.52867600 | 24.22272100 | 30.86542900 |
| N  | 21.04191700 | 27.21334300 | 30.40613700 |
| H  | 20.24180200 | 27.68116100 | 30.80330500 |
| H  | 21.51388500 | 27.65076800 | 29.63004100 |
| H  | 23.22695400 | 26.04464900 | 29.82044200 |
| H  | 24.46989000 | 23.03599300 | 32.72748300 |
| H  | 23.96695700 | 21.44421400 | 34.17808900 |
| H  | 21.24502900 | 23.49709500 | 34.41411900 |

**FapyG (N9H)**

|    |             |             |             |
|----|-------------|-------------|-------------|
| C  | 23.65143500 | 23.81410700 | 36.90677700 |
| C* | 22.98302100 | 25.18399200 | 36.84902200 |
| O  | 22.63857000 | 25.50633000 | 35.47975400 |

|    |             |             |             |
|----|-------------|-------------|-------------|
| C* | 21.67598400 | 25.24700800 | 37.63897300 |
| C  | 20.63824500 | 24.83860800 | 36.57760300 |
| C  | 21.26524700 | 25.37375800 | 35.28085600 |
| N* | 13.56100100 | 29.92300400 | 34.24599300 |
| C* | 14.57799800 | 28.98099500 | 33.83000900 |
| C* | 14.09299200 | 27.55500200 | 34.08700300 |
| O* | 14.09600400 | 26.72300000 | 33.17000000 |
| C  | 15.83890800 | 29.24103000 | 34.68571000 |
| C  | 17.11575600 | 28.54449700 | 34.20736500 |
| C  | 17.01060600 | 27.01516200 | 34.10982900 |
| C  | 18.38348100 | 26.37030600 | 34.17112000 |
| N  | 18.39515800 | 24.90957800 | 33.93281500 |
| H  | 15.61941100 | 28.95242800 | 35.72226000 |
| H  | 16.01127300 | 30.32494300 | 34.69509700 |
| H  | 17.92001400 | 28.80729600 | 34.90778900 |
| H  | 17.41137000 | 28.94550300 | 33.22928000 |
| H  | 16.40228800 | 26.62271400 | 34.93632600 |
| H  | 16.50567000 | 26.72641900 | 33.18414700 |
| H  | 18.80699900 | 26.54940100 | 35.16393800 |
| H  | 19.06392100 | 26.81175400 | 33.43646100 |
| H  | 17.79351900 | 24.43484200 | 34.60410400 |
| H  | 19.87649200 | 24.48085500 | 33.99629200 |
| H  | 18.01376600 | 24.71267300 | 33.00874600 |
| H  | 14.84654300 | 29.02510200 | 32.76182100 |
| H  | 13.93343900 | 30.86845700 | 34.22104300 |
| H  | 12.76755100 | 29.89977000 | 33.61071600 |
| H  | 24.04974400 | 23.63624100 | 37.91144300 |
| H  | 22.93581600 | 23.02115100 | 36.66797100 |
| H  | 23.69026300 | 25.95451300 | 37.17043200 |
| H  | 21.68017300 | 24.57724000 | 38.50160700 |
| H  | 20.55414700 | 23.74807600 | 36.52120500 |
| H  | 19.64202800 | 25.24822700 | 36.75638700 |
| H  | 20.85531100 | 26.32640100 | 34.94156600 |
| H  | 24.47696100 | 23.76677700 | 36.18939200 |
| H  | 21.48263600 | 26.26648200 | 37.98587300 |
| H  | 13.73415500 | 27.32334800 | 35.10847500 |
| N  | 21.06828900 | 25.74603600 | 32.24526300 |
| C  | 21.68189400 | 24.74940900 | 32.92543900 |
| C  | 22.84648300 | 24.13035000 | 32.53949400 |
| C  | 23.50264100 | 24.61759400 | 31.33212400 |
| N  | 22.81817300 | 25.64823100 | 30.68463400 |
| C  | 21.63927300 | 26.17540400 | 31.13562300 |
| N  | 23.57498200 | 23.09507700 | 33.15658100 |
| C  | 23.19093800 | 22.12508500 | 34.01275500 |
| N  | 20.99393300 | 24.40607200 | 34.14898700 |
| O  | 22.07359200 | 22.00377000 | 34.52986200 |
| O  | 24.57342300 | 24.19457500 | 30.90421800 |
| N  | 21.05217200 | 27.13970700 | 30.40408100 |
| H  | 20.23156500 | 27.58568800 | 30.78450500 |
| H  | 21.52051300 | 27.57951000 | 29.62723900 |
| H  | 23.25480700 | 25.99248300 | 29.83620900 |
| H  | 24.50388800 | 22.99657900 | 32.75324900 |
| H  | 24.00306800 | 21.41889900 | 34.22830900 |
| H  | 21.27252900 | 23.43234400 | 34.42872600 |

\* The atoms indicated by star were fixed during geometry optimizations. The initial geometries were derived from the 1N3C PDB x-ray structure.
